# Supplementary material for: Improved electron-molecule scattering calculations with the relativistic optical-potential method
Source: Royal Society of Chemistry journal article supplement (doi:10.1039/d6ra00742b), 2026-03-10
Supplement: d6ra00742b1.xlsx [file d6ra00742b1.xlsx]

## Sheet: Methane
	Elastic cross sections				Cross sections in with inelastic contribution						Elastic differential cross sections
	Energy	ECS	MTCS		Energy	ECS	ACS	TCS	MTCS		Angle	DCS_1eV	DCS_2eV	DCS_3eV	DCS_4eV	DCS_5eV	DCS_7.5eV	DCS_10eV	DCS_15eV	DCS_20eV	DCS_30eV	DCS_50eV	DCS_100eV	DCS_200eV	DCS_300eV	DCS_500eV
	1	1.1143	0.907892		1	1.1143	0	1.1143	0.907892		0	0.0578292	0.117117	0.57826	1.63182	3.32454	8.59219	12.334	15.3898	16.9081	19.1366	21.6909	24.4403	26.6922	28.1561	29.6686
	2	5.54784	4.3403		2	5.54784	0	5.54784	4.3403		0.5	0.0563421	0.115928	0.572999	1.62086	3.30409	8.5455	12.2782	15.294	16.7634	18.933	21.3129	23.8075	25.71	26.7914	27.9568
	3	9.50228	7.91552		3	9.50228	0	9.50228	7.91552		1	0.0523031	0.112935	0.559775	1.59232	3.25207	8.43445	12.1419	15.0805	16.4672	18.5151	20.68	22.8916	24.5007	25.427	26.3206
	4	13.0707	11.4759		4	13.0707	0	13.0707	11.4759		1.5	0.0467458	0.109384	0.543897	1.55583	3.18828	8.3118	11.9849	14.8658	16.1984	18.1399	20.1881	22.2133	23.593	24.3305	24.9057
	5	16.311	14.6213		5	16.311	0	16.311	14.6213		2	0.0407984	0.106322	0.529317	1.51992	3.12793	8.20354	11.8437	14.6842	15.9699	17.8296	19.7527	21.6103	22.7683	23.2892	23.4549
	6	19.0494	16.9581		6	19.0494	0	19.0494	16.9581		2.5	0.035251	0.104157	0.517084	1.48826	3.07503	8.10567	11.7187	14.5159	15.7547	17.5394	19.3664	21.0608	21.943	22.2146	21.9202
	7.5	21.8369	18.6454		7.5	21.8369	0	21.8369	18.6454		3	0.0304215	0.102824	0.50655	1.46037	3.02675	8.01108	11.5993	14.355	15.5572	17.2729	19.0018	20.5181	21.0969	21.0843	20.3285
	8	22.3947	18.7744		8	22.3947	0	22.3947	18.7744		3.5	0.0262775	0.102133	0.497038	1.43456	2.98045	7.92073	11.483	14.205	15.3708	17.0219	18.6502	19.9721	20.2111	19.9111	18.7271
	10	23.1449	17.9149		10	23.1449	0	23.1449	17.9149		4	0.0226493	0.101967	0.488436	1.40999	2.93616	7.83558	11.3721	14.0604	15.1892	16.7747	18.3013	19.4102	19.2962	18.7186	17.1581
	12	22.4608	16.0792		12	22.4608	0	22.4608	16.0792		4.5	0.0193947	0.102283	0.480842	1.38682	2.8946	7.75317	11.2654	13.9178	15.0133	16.5329	17.9492	18.8308	18.3617	17.5278	15.6481
	14	21.2492	14.1637		14	21.2487	0.00246886	21.2512	14.1631		5	0.0164595	0.103039	0.474177	1.36533	2.8554	7.67218	11.1597	13.7781	14.8385	16.2906	17.5912	18.2341	17.4179	16.3554	14.2094
	15	20.5954	13.2801		15	20.5882	0.0356042	20.6238	13.2707		5.5	0.0138508	0.10417	0.468236	1.3453	2.81757	7.59316	11.0545	13.6392	14.6633	16.0447	17.224	17.622	16.4786	15.2142	12.8466
	16	19.9482	12.462		16	19.9287	0.103586	20.0323	12.4341		6	0.0115812	0.10561	0.462887	1.32625	2.78075	7.5156	10.9503	13.4991	14.4876	15.7961	16.8483	16.9994	15.5507	14.1127	11.5618
	18	18.7238	11.0239		18	18.6595	0.321018	18.9805	10.9301		6.5	0.00963524	0.107329	0.458105	1.30795	2.74511	7.43829	10.8462	13.358	14.3089	15.5419	16.4626	16.3692	14.6424	13.0546	10.357
	20	17.6227	9.82419		20	17.4836	0.613086	18.0967	9.63416		7	0.007974	0.109317	0.453864	1.29042	2.71063	7.36113	10.741	13.2154	14.1275	15.2819	16.069	15.7367	13.7585	12.0418	9.23416
	25	15.3821	7.61111		25	14.9544	1.47946	16.4339	7.12627		7.5	0.00655676	0.111554	0.450091	1.27368	2.6769	7.28425	10.6344	13.0699	13.9427	15.0168	15.6673	15.1045	12.9014	11.0754	8.19513
	30	13.6847	6.1371		30	12.8962	2.35008	15.2462	5.3622		8	0.00535723	0.113996	0.446715	1.25763	2.6436	7.20706	10.5269	12.9219	13.7538	14.7454	15.2598	14.4771	12.0739	10.1565	7.24169
	35	12.3479	5.10134		35	11.1782	3.13781	14.316	4.07057		8.5	0.00436303	0.116601	0.443701	1.24207	2.61075	7.12916	10.4178	12.7711	13.5613	14.4689	14.8469	13.8563	11.2763	9.28566	6.37433
	40	11.2659	4.33787		40	9.70143	3.8342	13.5356	3.08265		9	0.00356542	0.119353	0.441031	1.22691	2.57842	7.0507	10.3067	12.617	13.3648	14.1876	14.431	13.2453	10.5096	8.46387	5.59153
	45	10.3742	3.75282		45	8.47503	4.37286	12.8479	2.34963		9.5	0.00295124	0.122256	0.438676	1.21217	2.54643	6.97158	10.1935	12.4599	13.1643	13.9013	14.0127	12.6451	9.77441	7.69228	4.89006
	50	9.62885	3.29061		50	7.51927	4.71233	12.2316	1.83631		10	0.00250315	0.125313	0.436605	1.19784	2.5146	6.89146	10.0786	12.2998	12.9604	13.6115	13.5941	12.0577	9.07088	6.97172	4.26566
	55	8.99775	2.91671		55	6.78159	4.89451	11.6761	1.47535		10.5	0.00220456	0.128503	0.434798	1.18387	2.48289	6.81032	9.96169	12.1365	12.7528	13.3184	13.1758	11.4837	8.4	6.30229	3.71349
	60	8.45694	2.60856		60	6.19667	4.97483	11.1715	1.20833		11	0.00204306	0.131798	0.433243	1.17018	2.45136	6.7283	9.84251	11.9702	12.5421	13.0225	12.7595	10.9241	7.76198	5.68361	3.22825
	65	7.98822	2.3508		65	5.71177	4.99604	10.7078	0.994101		11.5	0.00200943	0.135183	0.431926	1.15673	2.41999	6.64526	9.7213	11.8013	12.3285	12.7249	12.3458	10.3793	7.15752	5.11481	2.80434
	70	7.57766	2.13262		70	5.29494	4.9821	10.277	0.812519		12	0.00209473	0.138664	0.430834	1.14355	2.38866	6.56109	9.59824	11.6296	12.1123	12.4259	11.936	9.84971	6.58701	4.59435	2.43618
	80	6.89038	1.78534		80	4.65606	4.86379	9.51985	0.563481		12.5	0.002289	0.142253	0.429962	1.13063	2.35734	6.47593	9.47321	11.4554	11.8939	12.1262	11.5306	9.33572	6.05044	4.12017	2.11825
	90	6.3344	1.52374		90	4.22257	4.67338	8.89595	0.430576		13	0.0025826	0.145947	0.429306	1.11796	2.32608	6.38984	9.34622	11.2791	11.6736	11.8266	11.1303	8.83757	5.54791	3.69001	1.84505
	100	5.87211	1.32142		100	3.90792	4.46388	8.3718	0.35352		13.5	0.00296806	0.149729	0.428858	1.1055	2.29491	6.30275	9.21752	11.1008	11.4518	11.5272	10.7359	8.35558	5.07884	3.30144	1.61121
	120	5.14136	1.03154		120	3.46065	4.06286	7.52352	0.268155		14	0.00344007	0.153586	0.428614	1.09326	2.26379	6.21472	9.08727	10.9205	11.2288	11.2289	10.3476	7.8899	4.64265	2.95186	1.41172
	150	4.35684	0.759229		150	3.00797	3.55818	6.56615	0.204145		14.5	0.00399356	0.157519	0.428575	1.08124	2.23269	6.1259	8.95544	10.7388	11.0049	10.9322	9.96609	7.44087	4.23843	2.63859	1.24195
	200	3.50928	0.505456		200	2.51066	2.93992	5.45058	0.149366		15	0.00462208	0.16154	0.428747	1.06946	2.20165	6.0363	8.82215	10.5557	10.7806	10.6372	9.59145	7.00859	3.86499	2.35897	1.09774
	250	2.96185	0.362947		250	2.17158	2.5064	4.67798	0.115865		15.5	0.00531833	0.165658	0.429127	1.05792	2.17073	5.94595	8.68765	10.3715	10.556	10.3446	9.22419	6.59338	3.52119	2.11035	0.97534
	300	2.57274	0.27506		300	1.92047	2.18674	4.10721	0.0929078		16	0.00607617	0.169867	0.429712	1.04661	2.13992	5.85498	8.55206	10.1864	10.3315	10.0546	8.86436	6.19527	3.20556	1.89007	0.871448
	400	2.04689	0.176557		400	1.56842	1.74657	3.31499	0.064797		16.5	0.00689209	0.174154	0.430505	1.03555	2.10923	5.76351	8.41545	10.0007	10.1075	9.76762	8.51235	5.81449	2.91673	1.6955	0.783183
	500	1.70542	0.123813		500	1.3302	1.45778	2.78799	0.0482792		17	0.0077644	0.178515	0.431517	1.02475	2.07868	5.67155	8.27796	9.81454	9.88409	9.48396	8.16819	5.45096	2.65321	1.52413	0.708036
	1000	0.939102	0.0393148		1000	0.76856	0.809608	1.57817	0.0180285		17.5	0.00869102	0.182961	0.432752	1.01423	2.04832	5.5792	8.13982	9.62817	9.66155	9.20378	7.83216	5.10476	2.41347	1.37355	0.643832
	1500	0.650229	0.0196006		1500	0.545173	0.566218	1.11139	0.00939622		18	0.00966787	0.187502	0.434208	1.00398	2.0182	5.4866	8.00115	9.4418	9.44022	8.92734	7.50432	4.7757	2.19605	1.24148	0.58872
	2000	0.497797	0.0118566		2000	0.425563	0.436745	0.862307	0.00586519		18.5	0.0106896	0.192142	0.435886	0.994038	1.9883	5.39382	7.86204	9.25556	9.22023	8.65493	7.18487	4.46368	1.9994	1.12578	0.54115
	3000	0.339418	0.0057839		3000	0.300002	0.300297	0.600298	0.00314069		19	0.0117518	0.196873	0.437798	0.984401	1.95867	5.30093	7.72264	9.06972	9.00181	8.38661	6.87387	4.16839	1.82204	1.02453	0.49983
	4000	0.257851	0.00345972		4000	0.233708	0.229018	0.462725	0.00204568		19.5	0.0128527	0.201686	0.439952	0.975093	1.92936	5.20805	7.58314	8.88443	8.78519	8.12262	6.57147	3.88955	1.66249	0.935953	0.463688
	5000	0.208121	0.00231681		5000	0.191852	0.185242	0.377094	0.00145729		20	0.0139923	0.206585	0.442351	0.966127	1.90039	5.11528	7.44366	8.69983	8.57048	7.86312	6.27776	3.62676	1.51928	0.858426	0.431844
											20.5	0.0151704	0.211581	0.444992	0.957516	1.8718	5.02269	7.30429	8.51611	8.35788	7.60816	5.9928	3.37962	1.39103	0.790508	0.403578
											21	0.0163849	0.216683	0.447882	0.949277	1.84361	4.93037	7.16519	8.33344	8.14754	7.35794	5.7167	3.14762	1.27637	0.730906	0.378306
											21.5	0.0176318	0.221888	0.451035	0.941425	1.81586	4.83843	7.0265	8.15191	7.93957	7.11254	5.44948	2.93029	1.17402	0.678463	0.355547
											22	0.0189076	0.227187	0.454455	0.933976	1.78859	4.74695	6.88833	7.97169	7.73413	6.87202	5.19122	2.72708	1.08277	0.632161	0.334914
											22.5	0.0202109	0.232578	0.45814	0.926942	1.76183	4.65601	6.75077	7.79292	7.53131	6.63652	4.9419	2.53743	1.00148	0.591107	0.316096
											23	0.0215425	0.238068	0.462092	0.92034	1.7356	4.56568	6.61396	7.61569	7.33122	6.40609	4.70158	2.36078	0.929095	0.554528	0.298838
											23.5	0.0229033	0.243666	0.466321	0.914185	1.70995	4.47608	6.47801	7.4401	7.13397	6.1808	4.47018	2.19654	0.864639	0.521755	0.282935
											24	0.0242925	0.249376	0.470836	0.908491	1.68489	4.38725	6.34301	7.26629	6.93964	5.96074	4.24771	2.04414	0.807219	0.492217	0.268218
											24.5	0.0257073	0.255189	0.475637	0.903267	1.66046	4.29928	6.20905	7.09434	6.74831	5.74593	4.03409	1.90299	0.756015	0.465429	0.254547
											25	0.0271447	0.261102	0.48072	0.898526	1.6367	4.21224	6.07624	6.92433	6.56006	5.53644	3.82925	1.7725	0.71028	0.440981	0.241807
											25.5	0.0286033	0.267113	0.486091	0.894282	1.61361	4.1262	5.94468	6.75636	6.37496	5.33232	3.63308	1.65208	0.669339	0.418529	0.229897
											26	0.0300839	0.273231	0.491758	0.890549	1.59123	4.04122	5.81442	6.5905	6.19306	5.13357	3.44548	1.54116	0.632582	0.397783	0.218735
											26.5	0.0315877	0.279462	0.497726	0.887334	1.56959	3.95737	5.68556	6.42682	6.01444	4.94025	3.2663	1.43916	0.599462	0.378504	0.208246
											27	0.0331149	0.285804	0.503989	0.884643	1.5487	3.8747	5.55817	6.2654	5.83913	4.75238	3.09538	1.34553	0.569496	0.360494	0.198367
											27.5	0.0346638	0.292248	0.510545	0.882485	1.52859	3.79327	5.43234	6.10629	5.66719	4.56994	2.93257	1.25971	0.542251	0.343593	0.189044
											28	0.0362315	0.298792	0.517401	0.88087	1.50927	3.71313	5.30811	5.94956	5.49867	4.39296	2.77767	1.18116	0.517353	0.327669	0.180228
											28.5	0.0378165	0.305437	0.524561	0.879809	1.49076	3.63434	5.18554	5.79526	5.33358	4.22142	2.6305	1.10936	0.494473	0.312614	0.171875
											29	0.0394191	0.312189	0.532024	0.879304	1.47309	3.55693	5.06472	5.64345	5.17199	4.05531	2.49083	1.04382	0.473324	0.298345	0.163948
											29.5	0.0410405	0.319051	0.539782	0.879355	1.45626	3.48095	4.94568	5.49416	5.01391	3.8946	2.35847	0.984048	0.453667	0.284793	0.156415
											30	0.0426817	0.326016	0.547834	0.879966	1.44028	3.40644	4.82848	5.34744	4.85936	3.73927	2.23319	0.929584	0.435286	0.2719	0.149248
											30.5	0.0443417	0.333077	0.556185	0.881144	1.42518	3.33344	4.71316	5.20333	4.70837	3.58927	2.11476	0.879994	0.418006	0.25962	0.142423
											31	0.0460181	0.340231	0.564835	0.882894	1.41095	3.26197	4.59977	5.06187	4.56095	3.44455	2.00295	0.834859	0.401674	0.247916	0.13592
											31.5	0.0477091	0.347482	0.573777	0.885213	1.3976	3.19208	4.48836	4.92309	4.41712	3.30505	1.89753	0.793791	0.386162	0.236753	0.129721
											32	0.0494141	0.354832	0.583002	0.888097	1.38515	3.12378	4.37895	4.78701	4.27688	3.17071	1.79825	0.756419	0.371366	0.226105	0.123813
											32.5	0.0511343	0.36228	0.59251	0.891543	1.37359	3.0571	4.27159	4.65367	4.14023	3.04146	1.70488	0.722402	0.357193	0.215948	0.118184
											33	0.0528706	0.369818	0.602304	0.895554	1.36293	2.99207	4.1663	4.52309	4.00717	2.91721	1.61719	0.691413	0.343578	0.20626	0.112824
											33.5	0.0546229	0.377439	0.612377	0.900131	1.35318	2.92869	4.06311	4.39528	3.87769	2.79788	1.53492	0.663157	0.330458	0.197023	0.107727
											34	0.0563892	0.385141	0.622718	0.905265	1.34432	2.867	3.96205	4.27026	3.75179	2.68337	1.45785	0.637348	0.317793	0.188221	0.102885
											34.5	0.0581675	0.392926	0.633321	0.910946	1.33637	2.807	3.86314	4.14804	3.62944	2.57359	1.38573	0.613733	0.305546	0.179838	0.0982929
											35	0.0599565	0.400796	0.644183	0.917167	1.32931	2.7487	3.7664	4.02864	3.51063	2.46843	1.31833	0.592068	0.29369	0.171857	0.0939464
											35.5	0.0617567	0.408745	0.655303	0.923927	1.32314	2.69212	3.67185	3.91206	3.39533	2.36779	1.25542	0.572138	0.282209	0.164264	0.0898407
											36	0.0635692	0.416763	0.66667	0.931221	1.31785	2.63725	3.5795	3.7983	3.28351	2.27155	1.19677	0.553736	0.271082	0.157044	0.0859705
											36.5	0.0653941	0.424845	0.678271	0.939037	1.31345	2.58411	3.48937	3.68737	3.17514	2.1796	1.14216	0.536683	0.260305	0.150181	0.0823303
											37	0.0672303	0.43299	0.690098	0.94736	1.30992	2.5327	3.40146	3.57926	3.07019	2.09182	1.09136	0.520806	0.249867	0.14366	0.0789148
											37.5	0.0690757	0.441197	0.70215	0.956178	1.30725	2.48301	3.31579	3.47395	2.9686	2.00809	1.04415	0.50596	0.239761	0.137468	0.075717
											38	0.0709285	0.449465	0.714419	0.965485	1.30542	2.43504	3.23235	3.37146	2.87033	1.92829	1.00033	0.492005	0.229986	0.131591	0.072729
											38.5	0.0727884	0.457786	0.72689	0.975274	1.30443	2.3888	3.15115	3.27175	2.77534	1.85229	0.959685	0.478824	0.220533	0.126016	0.0699429
											39	0.074656	0.466151	0.739551	0.985528	1.30426	2.34427	3.07218	3.17483	2.68358	1.77998	0.922022	0.466305	0.211405	0.120731	0.0673505
											39.5	0.0765317	0.474555	0.752393	0.996227	1.30491	2.30144	2.99546	3.08066	2.59499	1.71122	0.88714	0.454357	0.202594	0.115725	0.0649415
											40	0.0784151	0.482995	0.765412	1.00736	1.30634	2.26031	2.92096	2.98922	2.50951	1.64589	0.854859	0.442894	0.194102	0.110986	0.0627046
											40.5	0.0803044	0.491471	0.778597	1.01891	1.30854	2.22086	2.84869	2.9005	2.42707	1.58387	0.824993	0.431847	0.185925	0.106504	0.0606291
											41	0.0821974	0.499978	0.791931	1.03086	1.31151	2.18309	2.77864	2.81446	2.34763	1.52503	0.797371	0.421152	0.178062	0.102268	0.058703
											41.5	0.0840929	0.508508	0.805401	1.04321	1.31522	2.14697	2.71078	2.73108	2.27112	1.46924	0.771828	0.410757	0.17051	0.0982672	0.0569135
											42	0.0859908	0.517052	0.819	1.05593	1.31964	2.11249	2.64512	2.65033	2.19746	1.41639	0.748204	0.400614	0.163265	0.094493	0.0552482
											42.5	0.0878917	0.525604	0.832718	1.06899	1.32476	2.07962	2.58164	2.57216	2.12659	1.36635	0.726351	0.390687	0.156325	0.090936	0.0536952
											43	0.0897954	0.534161	0.846543	1.08239	1.33056	2.04836	2.52031	2.49654	2.05844	1.319	0.70612	0.380942	0.149684	0.0875871	0.0522423
											43.5	0.0917007	0.542721	0.860456	1.09611	1.33702	2.01867	2.46112	2.42344	1.99293	1.27422	0.687383	0.371356	0.143339	0.084438	0.0508775
											44	0.0936055	0.55128	0.874446	1.11014	1.34411	1.99054	2.40404	2.35281	1.93001	1.23189	0.670003	0.361903	0.137282	0.0814814	0.0495898
											44.5	0.0955081	0.559826	0.888502	1.12444	1.35181	1.96394	2.34906	2.2846	1.86959	1.1919	0.653865	0.352571	0.131508	0.0787093	0.0483679
											45	0.0974075	0.568352	0.902615	1.13899	1.36009	1.93884	2.29614	2.21878	1.8116	1.15413	0.638852	0.343342	0.126008	0.0761144	0.0472012
											45.5	0.0993037	0.576852	0.91677	1.15378	1.36893	1.91522	2.24525	2.15529	1.75597	1.11847	0.624855	0.334212	0.120776	0.0736905	0.0460806
											46	0.101197	0.585322	0.930947	1.16879	1.3783	1.89305	2.19637	2.0941	1.70262	1.08481	0.611777	0.32517	0.115805	0.0714298	0.0449976
											46.5	0.103087	0.593759	0.945134	1.18401	1.38819	1.87229	2.14948	2.03514	1.65148	1.05304	0.599519	0.316217	0.111086	0.0693249	0.043944
											47	0.104971	0.602157	0.959323	1.1994	1.39855	1.85292	2.10452	1.97837	1.60248	1.02306	0.587999	0.307348	0.106612	0.0673695	0.0429136
											47.5	0.106849	0.610506	0.973501	1.21494	1.40937	1.8349	2.06147	1.92373	1.55554	0.994769	0.577128	0.298569	0.102374	0.0655561	0.0419017
											48	0.108717	0.618798	0.987651	1.23062	1.42062	1.81821	2.02029	1.87118	1.51059	0.968065	0.566835	0.289878	0.0983673	0.0638767	0.040903
											48.5	0.110576	0.627026	1.00175	1.24641	1.43227	1.8028	1.98095	1.82066	1.46756	0.942849	0.557047	0.281284	0.0945806	0.0623248	0.0399134
											49	0.112425	0.635187	1.0158	1.2623	1.4443	1.78864	1.9434	1.77211	1.42638	0.919029	0.547698	0.272789	0.0910095	0.0608934	0.0389305
											49.5	0.114265	0.643278	1.02978	1.27826	1.45666	1.77568	1.9076	1.72548	1.38697	0.896519	0.538731	0.264403	0.0876442	0.0595745	0.0379523
											50	0.116094	0.651292	1.04368	1.29427	1.46934	1.76391	1.8735	1.68072	1.34927	0.875226	0.530085	0.256129	0.0844778	0.0583615	0.0369768
											50.5	0.117911	0.659219	1.05748	1.3103	1.48231	1.75327	1.84108	1.63776	1.3132	0.855069	0.521718	0.24798	0.0815034	0.0572477	0.0360038
											51	0.119713	0.667051	1.07116	1.32633	1.49554	1.74373	1.81028	1.59655	1.2787	0.83597	0.513575	0.239957	0.0787118	0.0562255	0.0350336
											51.5	0.121499	0.674782	1.08472	1.34236	1.50899	1.73523	1.78105	1.55705	1.2457	0.817847	0.505622	0.232073	0.0760972	0.0552879	0.0340666
											52	0.123269	0.682408	1.09814	1.35835	1.52265	1.72776	1.75335	1.51917	1.21414	0.800627	0.497818	0.224332	0.0736508	0.0544278	0.0331043
											52.5	0.125022	0.689927	1.11141	1.37427	1.53647	1.72126	1.72713	1.48289	1.18394	0.784245	0.49013	0.216743	0.0713664	0.0536376	0.032148
											53	0.126758	0.69733	1.12452	1.39011	1.55044	1.71569	1.70235	1.44813	1.15506	0.768628	0.482532	0.20931	0.0692364	0.0529107	0.0311991
											53.5	0.128476	0.70461	1.13744	1.40584	1.56452	1.711	1.67895	1.41485	1.12742	0.753713	0.474992	0.202042	0.0672546	0.0522397	0.0302595
											54	0.130174	0.711758	1.15017	1.42146	1.57868	1.70715	1.65687	1.38298	1.10096	0.739446	0.467494	0.194941	0.0654137	0.0516172	0.0293316
											54.5	0.13185	0.718769	1.1627	1.43693	1.59289	1.70411	1.63608	1.35248	1.07563	0.725762	0.460015	0.188014	0.0637089	0.0510376	0.0284167
											55	0.133503	0.725639	1.17501	1.45223	1.60712	1.70181	1.61652	1.32329	1.05136	0.71261	0.452541	0.181264	0.0621321	0.0504942	0.0275169
											55.5	0.135132	0.732365	1.18709	1.46734	1.62136	1.70023	1.59814	1.29534	1.02811	0.699944	0.445059	0.174696	0.0606797	0.0499804	0.026635
											56	0.136737	0.73894	1.19892	1.48224	1.63556	1.6993	1.58088	1.26861	1.00581	0.687712	0.437555	0.168312	0.0593439	0.0494914	0.0257726
											56.5	0.138318	0.745357	1.21049	1.49692	1.64969	1.699	1.56469	1.24302	0.984411	0.675868	0.430026	0.162115	0.0581205	0.0490218	0.0249313
											57	0.139873	0.751608	1.2218	1.51134	1.66372	1.69927	1.54954	1.21853	0.963865	0.664378	0.422462	0.156108	0.0570034	0.0485661	0.0241133
											57.5	0.141401	0.757688	1.23283	1.5255	1.67764	1.70005	1.53535	1.19509	0.944124	0.653199	0.414862	0.15029	0.0559865	0.04812	0.0233196
											58	0.1429	0.763593	1.24357	1.53937	1.69141	1.70132	1.52207	1.17265	0.925132	0.642293	0.407221	0.144665	0.0550657	0.0476789	0.0225516
											58.5	0.144369	0.76932	1.254	1.55293	1.70501	1.70303	1.50966	1.15115	0.906847	0.631634	0.39954	0.139232	0.0542338	0.0472387	0.0218105
											59	0.145807	0.774865	1.26412	1.56616	1.71839	1.70512	1.49807	1.13056	0.889226	0.621187	0.391822	0.133992	0.0534869	0.0467962	0.0210967
											59.5	0.147214	0.780221	1.27392	1.57905	1.73154	1.70755	1.48724	1.11082	0.872221	0.610924	0.384065	0.128944	0.0528189	0.0463473	0.0204109
											60	0.148589	0.785381	1.28338	1.59158	1.74443	1.71028	1.47712	1.09189	0.855793	0.600823	0.376277	0.124088	0.052225	0.0458896	0.0197542
											60.5	0.149932	0.790339	1.29249	1.60372	1.75704	1.71326	1.46765	1.07372	0.839904	0.59086	0.368459	0.119422	0.0517001	0.0454213	0.0191265
											61	0.151241	0.795093	1.30125	1.61546	1.76934	1.71644	1.4588	1.05626	0.824513	0.581011	0.360617	0.114945	0.0512395	0.0449395	0.0185278
											61.5	0.152514	0.799641	1.30963	1.62679	1.78129	1.71979	1.4505	1.03949	0.809584	0.571262	0.352758	0.110654	0.0508378	0.0444432	0.0179585
											62	0.153751	0.803978	1.31765	1.63768	1.79288	1.72325	1.44272	1.02335	0.795086	0.561595	0.344887	0.106548	0.0504918	0.0439315	0.0174181
											62.5	0.154951	0.808101	1.32528	1.64813	1.80409	1.72678	1.4354	1.0078	0.780983	0.551993	0.337013	0.102623	0.0501949	0.0434033	0.0169061
											63	0.156112	0.812002	1.33252	1.65812	1.81488	1.73035	1.42849	0.992797	0.767243	0.542444	0.329141	0.0988759	0.0499451	0.0428585	0.0164222
											63.5	0.157237	0.815678	1.33936	1.66763	1.82524	1.7339	1.42195	0.978316	0.753841	0.532941	0.321281	0.0953043	0.0497358	0.0422966	0.0159653
											64	0.158322	0.819125	1.34579	1.67664	1.83513	1.7374	1.41573	0.964311	0.740746	0.523469	0.313442	0.0919026	0.0495646	0.0417178	0.0155352
											64.5	0.159368	0.822342	1.3518	1.68514	1.84454	1.74081	1.40979	0.950744	0.727932	0.514022	0.305628	0.088669	0.0494262	0.0411228	0.0151311
											65	0.160372	0.825327	1.3574	1.69312	1.85345	1.74408	1.40407	0.937585	0.715377	0.504596	0.297853	0.0855973	0.049317	0.0405115	0.0147519
											65.5	0.161334	0.828077	1.36256	1.70057	1.86183	1.74717	1.39855	0.9248	0.703057	0.495183	0.290121	0.0826852	0.049233	0.039885	0.0143968
											66	0.162253	0.830587	1.36728	1.70747	1.86967	1.75006	1.39317	0.912353	0.690949	0.485778	0.282442	0.0799267	0.0491703	0.0392446	0.0140651
											66.5	0.163129	0.832854	1.37156	1.71381	1.87694	1.75269	1.3879	0.900213	0.679036	0.476384	0.274826	0.0773187	0.0491248	0.038591	0.0137554
											67	0.163962	0.834875	1.37539	1.71958	1.88362	1.75504	1.3827	0.888353	0.6673	0.466996	0.267278	0.0748558	0.0490941	0.037926	0.0134669
											67.5	0.164752	0.836648	1.37877	1.72476	1.8897	1.75707	1.37752	0.876743	0.655722	0.457613	0.259811	0.072534	0.0490729	0.0372508	0.0131982
											68	0.165497	0.838174	1.3817	1.72936	1.89516	1.75874	1.37234	0.865353	0.644288	0.448238	0.252429	0.0703489	0.0490603	0.0365674	0.0129483
											68.5	0.166196	0.839451	1.38416	1.73336	1.89999	1.76002	1.36711	0.854158	0.632986	0.438875	0.245142	0.0682956	0.0490513	0.0358775	0.0127164
											69	0.166848	0.840476	1.38615	1.73675	1.90415	1.76089	1.36179	0.843135	0.6218	0.429521	0.237959	0.0663705	0.0490445	0.0351823	0.0125009
											69.5	0.167454	0.841247	1.38767	1.73952	1.90765	1.7613	1.35637	0.832259	0.610721	0.420184	0.230884	0.0645682	0.0490366	0.0344841	0.0123009
											70	0.168012	0.841761	1.38872	1.74166	1.91046	1.76123	1.35079	0.821505	0.59974	0.410868	0.223928	0.0628854	0.0490254	0.0337844	0.0121154
											70.5	0.168523	0.842018	1.38929	1.74317	1.91258	1.76066	1.34505	0.810854	0.588846	0.401577	0.217096	0.061317	0.0490086	0.0330846	0.0119432
											71	0.168986	0.842019	1.38939	1.74404	1.91399	1.75955	1.33909	0.800287	0.57803	0.392316	0.210394	0.0598593	0.0489845	0.0323867	0.0117833
											71.5	0.169402	0.841764	1.38901	1.74427	1.91467	1.75788	1.3329	0.789783	0.56729	0.383095	0.20383	0.0585078	0.0489504	0.031692	0.0116344
											72	0.169769	0.841252	1.38814	1.74384	1.91462	1.75562	1.32645	0.779322	0.556618	0.373917	0.197409	0.0572586	0.0489059	0.0310024	0.0114955
											72.5	0.170087	0.840482	1.38679	1.74276	1.91383	1.75276	1.31971	0.768893	0.546008	0.36479	0.191136	0.0561078	0.0488477	0.030319	0.0113658
											73	0.170355	0.839452	1.38496	1.74102	1.91229	1.74927	1.31266	0.758479	0.535458	0.355722	0.185018	0.0550511	0.0487764	0.0296433	0.0112439
											73.5	0.170573	0.838164	1.38264	1.73862	1.90999	1.74514	1.30528	0.748064	0.524966	0.346723	0.179058	0.0540851	0.0486889	0.0289771	0.0111288
											74	0.170742	0.836617	1.37985	1.73556	1.90692	1.74033	1.29754	0.737635	0.514528	0.337798	0.173261	0.0532056	0.0485854	0.0283211	0.0110199
											74.5	0.17086	0.834813	1.37656	1.73183	1.90308	1.73485	1.28943	0.727182	0.504144	0.328957	0.16763	0.0524091	0.0484646	0.027677	0.010916
											75	0.17093	0.832755	1.3728	1.72744	1.89846	1.72867	1.28093	0.716696	0.493814	0.32021	0.162169	0.0516923	0.0483257	0.0270455	0.0108166
											75.5	0.170949	0.830442	1.36856	1.72238	1.89306	1.72177	1.27202	0.706164	0.483538	0.311563	0.156882	0.0510511	0.0481684	0.0264279	0.0107205
											76	0.170919	0.827875	1.36384	1.71665	1.88688	1.71416	1.26269	0.695578	0.473317	0.303026	0.151771	0.0504829	0.0479922	0.0258249	0.0106271
											76.5	0.170837	0.825055	1.35864	1.71025	1.87991	1.7058	1.25292	0.684932	0.463153	0.294609	0.146838	0.0499837	0.0477969	0.0252371	0.0105358
											77	0.170705	0.821982	1.35297	1.70319	1.87215	1.69671	1.2427	0.674222	0.453048	0.28632	0.142085	0.0495511	0.0475829	0.0246654	0.0104456
											77.5	0.170522	0.818659	1.34683	1.69548	1.8636	1.68686	1.23202	0.663438	0.443004	0.278167	0.137512	0.0491816	0.0473494	0.0241101	0.0103562
											78	0.17029	0.815089	1.34023	1.68711	1.85426	1.67626	1.22087	0.652577	0.433025	0.270159	0.133123	0.0488723	0.0470977	0.0235719	0.0102666
											78.5	0.170007	0.811275	1.33316	1.67808	1.84414	1.6649	1.20925	0.641639	0.423116	0.262305	0.128917	0.0486208	0.0468274	0.0230508	0.0101767
											79	0.169675	0.807219	1.32564	1.6684	1.83324	1.65277	1.19714	0.63062	0.41328	0.254614	0.124895	0.0484238	0.0465391	0.0225474	0.0100861
											79.5	0.169294	0.802922	1.31766	1.65807	1.82156	1.63987	1.18454	0.619517	0.403521	0.247093	0.121056	0.0482794	0.0462339	0.0220619	0.009994
											80	0.168863	0.798387	1.30924	1.64711	1.8091	1.62621	1.17146	0.60833	0.393845	0.23975	0.117401	0.0481845	0.0459112	0.0215941	0.00990046
											80.5	0.168383	0.793615	1.30037	1.63552	1.79588	1.61178	1.15788	0.597061	0.384258	0.232595	0.113929	0.0481371	0.0455731	0.0211445	0.00980504
											81	0.167853	0.788612	1.29106	1.62331	1.7819	1.59659	1.1438	0.585712	0.374763	0.225632	0.11064	0.0481348	0.0452191	0.0207128	0.00970772
											81.5	0.167274	0.78338	1.28133	1.61048	1.76717	1.58065	1.12923	0.574283	0.365369	0.218871	0.107531	0.0481753	0.0448508	0.0202992	0.00960815
											82	0.166647	0.777925	1.27118	1.59703	1.75169	1.56395	1.11416	0.562776	0.356081	0.212318	0.104603	0.0482566	0.0444687	0.0199033	0.00950615
											82.5	0.165973	0.772248	1.26061	1.583	1.73548	1.54651	1.09861	0.551198	0.346905	0.20598	0.101853	0.0483766	0.0440737	0.019525	0.00940188
											83	0.165251	0.766354	1.24963	1.56837	1.71855	1.52833	1.08258	0.539552	0.337847	0.199863	0.0992788	0.0485332	0.0436669	0.0191642	0.00929512
											83.5	0.164483	0.760246	1.23825	1.55317	1.7009	1.50943	1.06607	0.527843	0.328916	0.193973	0.0968796	0.0487247	0.0432491	0.0188203	0.00918608
											84	0.163668	0.753926	1.22648	1.5374	1.68256	1.48982	1.04909	0.516075	0.320118	0.188316	0.0946529	0.0489491	0.0428213	0.0184932	0.00907457
											84.5	0.162806	0.747401	1.21432	1.52107	1.66354	1.4695	1.03164	0.504257	0.311459	0.182898	0.0925962	0.0492047	0.0423849	0.0181822	0.00896093
											85	0.161899	0.740675	1.20179	1.5042	1.64384	1.4485	1.01375	0.492397	0.302948	0.177722	0.090707	0.0494897	0.0419404	0.0178874	0.00884531
											85.5	0.160947	0.733752	1.1889	1.48681	1.6235	1.42683	0.995416	0.480499	0.294591	0.172794	0.0889827	0.0498025	0.0414892	0.0176079	0.00872781
											86	0.159951	0.726639	1.17565	1.46889	1.60251	1.4045	0.976654	0.468574	0.286396	0.168119	0.0874204	0.0501415	0.0410323	0.0173435	0.00860866
											86.5	0.158911	0.719339	1.16205	1.45048	1.5809	1.38155	0.957477	0.456629	0.278369	0.163699	0.0860172	0.0505051	0.0405704	0.0170936	0.00848795
											87	0.157828	0.711856	1.14812	1.43158	1.5587	1.35797	0.9379	0.444676	0.27052	0.159539	0.08477	0.050892	0.0401053	0.0168579	0.00836619
											87.5	0.156704	0.704196	1.13386	1.41221	1.53591	1.3338	0.917942	0.432723	0.262854	0.155642	0.0836755	0.0513004	0.039637	0.0166358	0.00824335
											88	0.155538	0.696363	1.11929	1.39238	1.51256	1.30906	0.897618	0.42078	0.25538	0.152011	0.0827306	0.0517292	0.0391673	0.0164267	0.00811981
											88.5	0.154331	0.688363	1.10441	1.37211	1.48866	1.28377	0.876945	0.408858	0.248104	0.148648	0.0819318	0.0521771	0.0386966	0.0162303	0.0079957
											89	0.153084	0.680202	1.08924	1.35142	1.46424	1.25795	0.855942	0.396969	0.241035	0.145555	0.0812758	0.0526425	0.0382259	0.0160461	0.00787147
											89.5	0.151798	0.671887	1.07379	1.33033	1.43933	1.23163	0.83463	0.385125	0.234179	0.142735	0.0807588	0.0531245	0.0377564	0.0158734	0.00774732
											90	0.150473	0.663423	1.05808	1.30885	1.41394	1.20484	0.813032	0.373335	0.227544	0.140188	0.0803775	0.0536218	0.0372881	0.0157117	0.00762346
											90.5	0.149112	0.654814	1.0421	1.287	1.3881	1.1776	0.791169	0.361614	0.221135	0.137915	0.0801283	0.0541331	0.0368228	0.0155605	0.00750021
											91	0.147713	0.646066	1.02588	1.2648	1.36183	1.14994	0.769064	0.349974	0.214962	0.135918	0.0800073	0.0546575	0.0363604	0.0154194	0.00737783
											91.5	0.14628	0.637186	1.00943	1.24227	1.33516	1.12189	0.74674	0.338428	0.20903	0.134196	0.080011	0.0551938	0.035902	0.0152877	0.00725667
											92	0.144812	0.628179	0.992762	1.21943	1.3081	1.09349	0.724222	0.326989	0.203346	0.13275	0.0801358	0.0557411	0.0354484	0.0151648	0.00713675
											92.5	0.14331	0.619051	0.975884	1.1963	1.2807	1.06476	0.701536	0.315669	0.197917	0.131579	0.0803778	0.0562983	0.0349996	0.0150505	0.00701844
											93	0.141776	0.609811	0.958814	1.1729	1.25297	1.03573	0.678711	0.304484	0.192749	0.130682	0.0807335	0.0568644	0.034557	0.014944	0.00690184
											93.5	0.14021	0.600463	0.941564	1.14924	1.22495	1.00644	0.655771	0.293447	0.187849	0.130059	0.0811993	0.0574386	0.0341205	0.014845	0.00678733
											94	0.138613	0.591014	0.924148	1.12536	1.19665	0.976917	0.632745	0.282571	0.183222	0.129709	0.0817712	0.0580199	0.0336909	0.0147529	0.00667484
											94.5	0.136986	0.58147	0.90658	1.10127	1.16812	0.947201	0.60966	0.271872	0.178874	0.129629	0.0824459	0.0586076	0.0332687	0.0146674	0.00656469
											95	0.135331	0.571838	0.888872	1.077	1.13937	0.917325	0.586547	0.261363	0.174811	0.129818	0.0832198	0.0592008	0.032854	0.0145879	0.00645691
											95.5	0.133649	0.562123	0.871039	1.05255	1.11043	0.887323	0.563436	0.251059	0.171039	0.130273	0.0840892	0.0597986	0.0324476	0.014514	0.00635185
											96	0.13194	0.552332	0.853094	1.02797	1.08134	0.857232	0.540357	0.240975	0.167563	0.130993	0.0850507	0.0604004	0.0320495	0.0144452	0.0062494
											96.5	0.130207	0.542473	0.835052	1.00327	1.05212	0.827089	0.51734	0.231125	0.164388	0.131974	0.0861009	0.0610054	0.0316601	0.0143813	0.00614978
											97	0.128449	0.532551	0.816927	0.978467	1.02281	0.796932	0.494417	0.221525	0.161518	0.133213	0.0872364	0.0616129	0.0312798	0.0143217	0.006053
											97.5	0.126669	0.522575	0.798735	0.953593	0.993437	0.766796	0.471618	0.212188	0.158959	0.134707	0.0884536	0.0622222	0.0309084	0.014266	0.00595928
											98	0.124866	0.51255	0.780488	0.928667	0.964027	0.736721	0.448978	0.20313	0.156715	0.136452	0.0897498	0.0628327	0.0305466	0.0142138	0.00586851
											98.5	0.123043	0.502484	0.762201	0.903712	0.934613	0.706744	0.426528	0.194366	0.15479	0.138446	0.0911214	0.0634439	0.0301942	0.0141649	0.00578079
											99	0.1212	0.492381	0.743888	0.878751	0.905227	0.676905	0.404301	0.18591	0.153189	0.140682	0.0925652	0.064055	0.0298514	0.0141188	0.00569607
											99.5	0.119339	0.48225	0.725564	0.853806	0.8759	0.647244	0.38233	0.177777	0.151914	0.143158	0.0940784	0.0646656	0.0295184	0.0140751	0.00561451
											100	0.11746	0.472096	0.707243	0.828904	0.846664	0.617798	0.360648	0.169983	0.150969	0.145869	0.0956581	0.0652751	0.029195	0.0140336	0.00553595
											100.5	0.115567	0.461927	0.688941	0.804066	0.817549	0.588606	0.339288	0.162542	0.150358	0.148811	0.0973011	0.0658831	0.0288815	0.013994	0.00546047
											101	0.113658	0.451749	0.670672	0.779316	0.788587	0.559709	0.318284	0.155468	0.150084	0.151978	0.0990047	0.066489	0.0285777	0.0139559	0.00538794
											101.5	0.111736	0.441571	0.65245	0.754678	0.759809	0.531146	0.297671	0.148777	0.150149	0.155365	0.100766	0.0670925	0.0282837	0.013919	0.00531851
											102	0.109802	0.431397	0.634289	0.730174	0.731247	0.502958	0.277481	0.142482	0.150556	0.158968	0.102583	0.0676931	0.0279995	0.0138833	0.00525198
											102.5	0.107857	0.421236	0.616203	0.705826	0.702933	0.475185	0.257749	0.136598	0.151307	0.16278	0.104453	0.0682904	0.0277248	0.0138483	0.00518841
											103	0.105902	0.411092	0.598208	0.68166	0.674898	0.447864	0.238507	0.131139	0.152405	0.166798	0.106373	0.0688841	0.0274599	0.0138138	0.0051276
											103.5	0.103938	0.400973	0.580317	0.657697	0.647174	0.421036	0.219789	0.126119	0.153851	0.171015	0.10834	0.0694739	0.0272044	0.0137797	0.00506967
											104	0.101966	0.390885	0.562545	0.633962	0.619791	0.394741	0.20163	0.121552	0.155647	0.175424	0.110353	0.0700594	0.0269583	0.0137458	0.00501443
											104.5	0.0999884	0.380834	0.544907	0.610478	0.592779	0.369018	0.184062	0.117452	0.157795	0.180022	0.112409	0.0706403	0.0267217	0.0137117	0.00496184
											105	0.0980058	0.370828	0.527415	0.587267	0.566171	0.343906	0.167119	0.113832	0.160295	0.184801	0.114507	0.0712164	0.026494	0.0136775	0.00491174
											105.5	0.0960196	0.360873	0.510084	0.564352	0.539996	0.319444	0.150834	0.110705	0.163148	0.189756	0.116643	0.0717874	0.0262755	0.0136429	0.00486416
											106	0.0940309	0.350975	0.492926	0.541754	0.514285	0.295671	0.135239	0.108084	0.166356	0.194881	0.118816	0.0723531	0.0260659	0.0136079	0.00481895
											106.5	0.0920408	0.341141	0.475957	0.519495	0.489069	0.272625	0.120366	0.105982	0.169918	0.200169	0.121024	0.0729133	0.0258648	0.0135722	0.00477602
											107	0.0900505	0.331377	0.459189	0.497599	0.464376	0.250342	0.106248	0.104412	0.173836	0.205614	0.123265	0.0734677	0.0256725	0.0135356	0.00473525
											107.5	0.0880611	0.321688	0.442636	0.476085	0.440237	0.228863	0.0929162	0.103385	0.178108	0.211211	0.125538	0.0740164	0.0254884	0.0134983	0.00469657
											108	0.0860737	0.312081	0.426312	0.454978	0.416679	0.208222	0.0804023	0.102914	0.182735	0.216953	0.12784	0.074559	0.0253125	0.0134599	0.00465996
											108.5	0.0840896	0.302561	0.410228	0.434296	0.393731	0.188457	0.0687368	0.10301	0.187717	0.222833	0.130171	0.0750954	0.0251447	0.0134206	0.00462519
											109	0.0821099	0.293135	0.394397	0.414062	0.371421	0.169604	0.0579497	0.103684	0.193053	0.228846	0.132528	0.0756257	0.0249846	0.0133801	0.00459226
											109.5	0.0801358	0.283808	0.378833	0.394294	0.349778	0.151697	0.0480709	0.104947	0.198742	0.234985	0.134909	0.0761496	0.0248322	0.0133385	0.004561
											110	0.0781685	0.274586	0.363546	0.375014	0.328828	0.134771	0.0391294	0.10681	0.204784	0.241243	0.137315	0.076667	0.0246871	0.0132957	0.00453143
											110.5	0.0762092	0.265475	0.34855	0.35624	0.308599	0.118861	0.0311541	0.109283	0.211176	0.247615	0.139743	0.077178	0.0245493	0.0132517	0.00450336
											111	0.074259	0.25648	0.333856	0.337992	0.289115	0.104	0.0241729	0.112376	0.217919	0.254094	0.142192	0.0776824	0.0244184	0.0132064	0.00447669
											111.5	0.0723189	0.247607	0.319476	0.320289	0.270402	0.0902204	0.0182129	0.116097	0.225009	0.260674	0.144661	0.0781802	0.0242944	0.0131599	0.00445136
											112	0.07039	0.238861	0.305421	0.303149	0.252485	0.0775537	0.0133008	0.120458	0.232447	0.267349	0.147149	0.0786715	0.024177	0.0131122	0.00442726
											112.5	0.0684732	0.230247	0.291703	0.28659	0.235389	0.066031	0.00946228	0.125465	0.240228	0.274112	0.149655	0.0791561	0.024066	0.0130631	0.00440435
											113	0.0665696	0.221769	0.278331	0.270631	0.219136	0.0556825	0.0067225	0.131127	0.248352	0.280957	0.152177	0.0796342	0.0239613	0.0130128	0.00438243
											113.5	0.0646801	0.213433	0.265316	0.255287	0.20375	0.0465375	0.00510579	0.137453	0.256817	0.287879	0.154714	0.0801055	0.0238626	0.0129614	0.0043615
											114	0.0628059	0.205243	0.252668	0.240575	0.189254	0.0386245	0.00463559	0.144448	0.265619	0.29487	0.157267	0.0805704	0.0237696	0.0129087	0.00434147
											114.5	0.0609479	0.197204	0.240397	0.22651	0.175668	0.0319707	0.0053345	0.152121	0.274756	0.301925	0.159834	0.0810288	0.0236824	0.0128548	0.00432226
											115	0.0591072	0.189321	0.228513	0.213109	0.163013	0.0266024	0.00722424	0.160478	0.284226	0.309039	0.162414	0.0814806	0.0236006	0.0127998	0.00430378
											115.5	0.0572846	0.181599	0.217025	0.200386	0.151309	0.022545	0.0103257	0.169524	0.294024	0.316205	0.165007	0.0819259	0.023524	0.0127437	0.00428591
											116	0.0554813	0.17404	0.205942	0.188355	0.140575	0.0198228	0.0146588	0.179266	0.304149	0.323417	0.167612	0.082365	0.0234526	0.0126865	0.0042687
											116.5	0.0536979	0.16665	0.195272	0.17703	0.130829	0.0184592	0.0202425	0.189708	0.314598	0.33067	0.170228	0.0827978	0.023386	0.0126283	0.004252
											117	0.0519356	0.159432	0.185023	0.166425	0.122089	0.0184763	0.0270948	0.200855	0.325365	0.337958	0.172854	0.0832242	0.0233241	0.0125692	0.00423574
											117.5	0.0501949	0.15239	0.175204	0.156551	0.114372	0.0198952	0.0352327	0.212712	0.336448	0.345276	0.175491	0.0836445	0.0232668	0.0125092	0.00421989
											118	0.0484768	0.145527	0.165821	0.147421	0.107694	0.0227358	0.0446721	0.225281	0.347844	0.352617	0.178138	0.0840588	0.0232138	0.0124483	0.00420435
											118.5	0.0467821	0.138847	0.156881	0.139045	0.102069	0.0270167	0.0554277	0.238565	0.359548	0.359978	0.180793	0.0844671	0.0231651	0.0123867	0.00418916
											119	0.0451114	0.132353	0.148392	0.131434	0.0975114	0.0327555	0.0675136	0.252568	0.371556	0.367351	0.183457	0.0848694	0.0231204	0.0123243	0.00417416
											119.5	0.0434656	0.126048	0.140359	0.124598	0.0940342	0.0399686	0.0809427	0.267292	0.383864	0.374734	0.18613	0.0852661	0.0230795	0.0122612	0.00415931
											120	0.0418454	0.119935	0.132789	0.118547	0.0916496	0.0486709	0.0957267	0.282737	0.396467	0.382119	0.188811	0.085657	0.0230424	0.0121976	0.00414463
											120.5	0.0402515	0.114018	0.125687	0.113288	0.090369	0.0588764	0.111876	0.298905	0.409362	0.389504	0.191499	0.0860423	0.0230088	0.0121334	0.00413003
											121	0.0386847	0.108298	0.119058	0.10883	0.0902026	0.0705974	0.1294	0.315796	0.422543	0.396881	0.194195	0.0864219	0.0229787	0.0120688	0.00411551
											121.5	0.0371456	0.102778	0.112907	0.10518	0.0911597	0.0838452	0.148307	0.333411	0.436007	0.404248	0.196897	0.0867964	0.0229518	0.0120037	0.00410097
											122	0.0356348	0.0974609	0.107238	0.102345	0.0932488	0.0986299	0.168605	0.351749	0.449747	0.411598	0.199607	0.0871654	0.022928	0.0119383	0.0040864
											122.5	0.0341529	0.092348	0.102055	0.10033	0.0964773	0.11496	0.190298	0.370808	0.46376	0.418929	0.202323	0.0875293	0.0229072	0.0118726	0.00407186
											123	0.0327005	0.0874414	0.0973613	0.0991411	0.100851	0.132843	0.213392	0.390587	0.478039	0.426236	0.205045	0.0878879	0.0228893	0.0118068	0.00405722
											123.5	0.0312781	0.0827428	0.0931603	0.0987815	0.106377	0.152284	0.237891	0.411084	0.49258	0.433513	0.207774	0.0882417	0.0228741	0.0117408	0.00404246
											124	0.0298862	0.0782539	0.0894546	0.0992554	0.113057	0.173289	0.263796	0.432296	0.507377	0.440758	0.210508	0.0885906	0.0228615	0.0116746	0.00402761
											124.5	0.0285253	0.073976	0.0862463	0.100566	0.120897	0.19586	0.29111	0.454219	0.522426	0.447966	0.213248	0.0889345	0.0228513	0.0116084	0.00401263
											125	0.0271957	0.0699104	0.0835373	0.102715	0.129898	0.219999	0.319832	0.476851	0.537719	0.455133	0.215993	0.0892737	0.0228435	0.0115423	0.00399753
											125.5	0.025898	0.0660582	0.081329	0.105704	0.140062	0.245707	0.349961	0.500185	0.553252	0.462257	0.218743	0.0896084	0.0228379	0.0114763	0.00398226
											126	0.0246324	0.0624202	0.0796222	0.109534	0.151389	0.272982	0.381494	0.524218	0.569019	0.469333	0.221499	0.0899386	0.0228344	0.0114103	0.00396678
											126.5	0.0233994	0.0589971	0.0784174	0.114205	0.163878	0.301823	0.414427	0.548944	0.585014	0.476357	0.224259	0.0902642	0.022833	0.0113445	0.00395117
											127	0.0221993	0.0557895	0.0777149	0.119717	0.177527	0.332226	0.448755	0.574356	0.601232	0.483327	0.227025	0.0905855	0.0228334	0.011279	0.00393539
											127.5	0.0210325	0.0527976	0.0775143	0.126067	0.192335	0.364185	0.484473	0.600449	0.617665	0.490239	0.229795	0.0909025	0.0228357	0.0112137	0.00391937
											128	0.0198991	0.0500216	0.0778148	0.133254	0.208296	0.397693	0.521574	0.627216	0.634308	0.49709	0.232569	0.0912155	0.0228396	0.0111487	0.00390317
											128.5	0.0187995	0.0474615	0.0786152	0.141274	0.225407	0.432744	0.560047	0.654647	0.651153	0.503878	0.235347	0.0915241	0.0228452	0.0110842	0.00388679
											129	0.0177338	0.0451169	0.0799141	0.150125	0.243662	0.469327	0.599884	0.682735	0.668196	0.5106	0.238129	0.0918289	0.0228523	0.01102	0.00387022
											129.5	0.0167022	0.0429876	0.0817092	0.159802	0.263054	0.507433	0.641073	0.711472	0.68543	0.517252	0.240915	0.0921297	0.0228608	0.0109562	0.00385345
											130	0.0157049	0.041073	0.0839982	0.170299	0.283574	0.547048	0.683602	0.740847	0.702847	0.523833	0.243705	0.0924267	0.0228707	0.0108929	0.00383648
											130.5	0.0147419	0.0393723	0.0867783	0.181612	0.305215	0.588159	0.727456	0.770852	0.720443	0.53034	0.246498	0.0927198	0.0228818	0.0108301	0.00381932
											131	0.0138134	0.0378847	0.0900461	0.193733	0.327966	0.630752	0.772622	0.801476	0.738209	0.536771	0.249294	0.0930092	0.0228941	0.0107679	0.00380201
											131.5	0.0129194	0.0366091	0.0937979	0.206656	0.351816	0.674811	0.819083	0.832707	0.756138	0.543123	0.252094	0.093295	0.0229076	0.0107062	0.00378454
											132	0.0120599	0.0355443	0.0980297	0.220372	0.376754	0.720317	0.866823	0.864535	0.774224	0.549395	0.254896	0.0935772	0.022922	0.0106452	0.00376686
											132.5	0.0112349	0.0346888	0.102737	0.234872	0.402767	0.767251	0.915823	0.896948	0.792461	0.555586	0.2577	0.0938559	0.0229375	0.0105847	0.00374905
											133	0.0104444	0.034041	0.107915	0.250148	0.429841	0.815594	0.966063	0.929932	0.81084	0.561692	0.260507	0.094131	0.0229538	0.010525	0.00373114
											133.5	0.00968823	0.0335993	0.113558	0.26619	0.457961	0.865324	1.01752	0.963476	0.829356	0.567713	0.263316	0.0944028	0.022971	0.0104658	0.00371307
											134	0.00896643	0.0333615	0.119661	0.282986	0.487112	0.916418	1.07018	0.997565	0.848	0.573646	0.266126	0.0946711	0.022989	0.0104074	0.00369486
											134.5	0.00827885	0.0333258	0.126217	0.300526	0.517278	0.968851	1.12401	1.03219	0.866766	0.579491	0.268938	0.0949364	0.0230076	0.0103497	0.00367656
											135	0.00762533	0.0334898	0.13322	0.318798	0.54844	1.0226	1.17899	1.06732	0.885646	0.585246	0.271751	0.0951982	0.023027	0.0102927	0.00365819
											135.5	0.0070057	0.0338511	0.140663	0.337789	0.580581	1.07764	1.2351	1.10297	0.904633	0.590911	0.274564	0.0954568	0.023047	0.0102365	0.00363971
											136	0.00641976	0.0344073	0.148539	0.357485	0.613681	1.13393	1.29231	1.13909	0.923719	0.596484	0.277378	0.0957122	0.0230675	0.010181	0.00362116
											136.5	0.00586728	0.0351555	0.156841	0.377874	0.647719	1.19146	1.35058	1.17569	0.942897	0.601964	0.280191	0.0959645	0.0230885	0.0101263	0.00360256
											137	0.00534798	0.036093	0.16556	0.39894	0.682676	1.25019	1.4099	1.21275	0.96216	0.60735	0.283005	0.0962138	0.02311	0.0100723	0.00358391
											137.5	0.00486159	0.0372167	0.174688	0.420669	0.718528	1.31008	1.47024	1.25024	0.981501	0.612642	0.285818	0.09646	0.023132	0.0100191	0.00356524
											138	0.00440779	0.0385235	0.184217	0.443044	0.755253	1.37111	1.53155	1.28816	1.00091	0.617839	0.288629	0.096703	0.0231543	0.00996673	0.00354654
											138.5	0.00398624	0.0400102	0.194138	0.46605	0.792828	1.43325	1.59382	1.32647	1.02038	0.62294	0.291438	0.0969431	0.023177	0.00991515	0.00352783
											139	0.00359657	0.0416732	0.204441	0.489669	0.831228	1.49645	1.65701	1.36518	1.03991	0.627946	0.294246	0.0971802	0.0232	0.00986434	0.00350913
											139.5	0.0032384	0.0435091	0.215116	0.513884	0.870428	1.56068	1.72108	1.40425	1.05948	0.632856	0.29705	0.0974145	0.0232232	0.00981433	0.00349046
											140	0.0029113	0.0455141	0.226154	0.538678	0.910403	1.62591	1.786	1.44367	1.07909	0.637669	0.299852	0.0976458	0.0232467	0.00976514	0.00347183
											140.5	0.00261485	0.0476845	0.237545	0.564032	0.951127	1.6921	1.85174	1.48342	1.09873	0.642386	0.30265	0.097874	0.0232704	0.00971676	0.00345321
											141	0.00234859	0.0500162	0.249278	0.589927	0.992571	1.7592	1.91826	1.52349	1.11839	0.647005	0.305444	0.0980994	0.0232943	0.00966916	0.00343467
											141.5	0.00211203	0.0525052	0.261342	0.616343	1.03471	1.82719	1.98552	1.56384	1.13807	0.651529	0.308233	0.0983219	0.0233183	0.00962237	0.00341622
											142	0.00190468	0.0551474	0.273727	0.643262	1.07751	1.89601	2.05349	1.60446	1.15776	0.655956	0.311017	0.0985417	0.0233425	0.00957639	0.00339785
											142.5	0.00172602	0.0579385	0.28642	0.670663	1.12094	1.96562	2.12212	1.64533	1.17744	0.660287	0.313794	0.0987585	0.0233667	0.00953122	0.00337955
											143	0.00157549	0.0608741	0.29941	0.698524	1.16499	2.03599	2.19139	1.68644	1.19712	0.664522	0.316566	0.0989725	0.0233911	0.00948683	0.00336136
											143.5	0.00145255	0.0639497	0.312686	0.726825	1.2096	2.10707	2.26123	1.72775	1.21678	0.668662	0.31933	0.0991835	0.0234154	0.00944324	0.00334332
											144	0.00135659	0.0671608	0.326236	0.755545	1.25476	2.17881	2.33163	1.76925	1.23641	0.672707	0.322086	0.0993918	0.0234398	0.00940045	0.0033254
											144.5	0.00128703	0.0705025	0.340046	0.78466	1.30043	2.25118	2.40253	1.81091	1.25601	0.676657	0.324833	0.0995972	0.0234642	0.00935844	0.0033076
											145	0.00124324	0.0739702	0.354105	0.81415	1.34658	2.32412	2.47389	1.85272	1.27558	0.680513	0.327571	0.0997999	0.0234886	0.00931721	0.00328995
											145.5	0.00122458	0.077559	0.368401	0.843991	1.39318	2.39759	2.54568	1.89465	1.29509	0.684276	0.3303	0.0999997	0.023513	0.00927676	0.00327248
											146	0.0012304	0.0812638	0.382919	0.87416	1.4402	2.47154	2.61784	1.93668	1.31455	0.687946	0.333017	0.100197	0.0235373	0.00923708	0.00325519
											146.5	0.00126003	0.0850798	0.397647	0.904634	1.48759	2.54593	2.69033	1.97879	1.33394	0.691524	0.335723	0.100391	0.0235615	0.00919817	0.00323806
											147	0.00131279	0.0890018	0.412571	0.93539	1.53534	2.6207	2.76312	2.02095	1.35326	0.695012	0.338417	0.100582	0.0235857	0.00916001	0.0032211
											147.5	0.00138797	0.0930245	0.427679	0.966403	1.58339	2.69581	2.83614	2.06314	1.3725	0.698409	0.341098	0.100771	0.0236098	0.00912262	0.00320436
											148	0.00148486	0.0971428	0.442957	0.99765	1.63173	2.77121	2.90937	2.10534	1.39165	0.701717	0.343765	0.100956	0.0236337	0.00908597	0.00318783
											148.5	0.00160275	0.101351	0.458391	1.02911	1.68031	2.84685	2.98276	2.14753	1.41071	0.704937	0.346418	0.101139	0.0236575	0.00905005	0.00317149
											149	0.00174089	0.105645	0.473966	1.06075	1.72909	2.92268	3.05625	2.18968	1.42966	0.708069	0.349054	0.101319	0.0236812	0.00901486	0.00315537
											149.5	0.00189854	0.110018	0.48967	1.09255	1.77805	2.99865	3.12981	2.23176	1.4485	0.711115	0.351675	0.101497	0.0237048	0.00898042	0.00313948
											150	0.00207494	0.114465	0.505489	1.12448	1.82715	3.07471	3.20338	2.27377	1.46721	0.714076	0.354278	0.101671	0.0237282	0.00894669	0.00312382
											150.5	0.00226933	0.11898	0.521407	1.15653	1.87635	3.15081	3.27692	2.31566	1.48581	0.716953	0.356864	0.101843	0.0237514	0.00891365	0.00310838
											151	0.00248094	0.123559	0.537412	1.18866	1.92562	3.22689	3.35038	2.35743	1.50426	0.719747	0.359431	0.102011	0.0237744	0.00888133	0.00309319
											151.5	0.00270897	0.128195	0.553488	1.22085	1.97492	3.30291	3.42372	2.39904	1.52257	0.722459	0.361977	0.102177	0.0237973	0.00884971	0.00307825
											152	0.00295265	0.132884	0.569622	1.25308	2.02421	3.37881	3.49689	2.44046	1.54074	0.725091	0.364503	0.10234	0.0238199	0.00881878	0.00306357
											152.5	0.00321118	0.137618	0.585799	1.28532	2.07345	3.45455	3.56984	2.48169	1.55874	0.727644	0.367008	0.102501	0.0238423	0.00878853	0.00304912
											153	0.00348375	0.142394	0.602004	1.31754	2.12262	3.53007	3.64252	2.52269	1.57657	0.730119	0.369489	0.102658	0.0238646	0.00875895	0.00303492
											153.5	0.00376956	0.147204	0.618224	1.34972	2.17167	3.60532	3.71489	2.56344	1.59424	0.732517	0.371948	0.102813	0.0238865	0.00873005	0.003021
											154	0.0040678	0.152044	0.634445	1.38183	2.22057	3.68024	3.7869	2.60392	1.61172	0.73484	0.374381	0.102964	0.0239083	0.0087018	0.00300737
											154.5	0.00437766	0.156908	0.650651	1.41385	2.26928	3.75479	3.8585	2.6441	1.62901	0.73709	0.37679	0.103113	0.0239298	0.00867421	0.00299398
											155	0.00469833	0.161791	0.666828	1.44575	2.31777	3.82892	3.92965	2.68396	1.6461	0.739266	0.379172	0.103259	0.0239511	0.00864727	0.00298084
											155.5	0.00502899	0.166686	0.682962	1.47751	2.366	3.90257	4.0003	2.72347	1.66299	0.741371	0.381527	0.103402	0.0239721	0.00862098	0.00296799
											156	0.00536883	0.171588	0.699039	1.5091	2.41393	3.9757	4.07039	2.76262	1.67968	0.743406	0.383854	0.103542	0.0239927	0.00859531	0.00295543
											156.5	0.00571703	0.176492	0.715045	1.54049	2.46152	4.04824	4.1399	2.80138	1.69614	0.745372	0.386151	0.10368	0.0240132	0.00857026	0.00294315
											157	0.00607278	0.181392	0.730965	1.57167	2.50875	4.12016	4.20876	2.83973	1.71237	0.747271	0.388419	0.103814	0.0240333	0.00854585	0.00293112
											157.5	0.00643527	0.186282	0.746785	1.60261	2.55558	4.1914	4.27693	2.87764	1.72838	0.749104	0.390655	0.103946	0.0240532	0.00852205	0.00291938
											158	0.0068037	0.191157	0.762492	1.63328	2.60197	4.26191	4.34437	2.91509	1.74414	0.750873	0.392859	0.104075	0.0240728	0.00849886	0.00290793
											158.5	0.00717725	0.196012	0.778072	1.66365	2.64788	4.33164	4.41103	2.95207	1.75966	0.752579	0.39503	0.104201	0.024092	0.00847627	0.00289676
											159	0.00755513	0.200841	0.79351	1.69372	2.69328	4.40055	4.47687	2.98854	1.77493	0.754223	0.397167	0.104324	0.024111	0.00845429	0.00288585
											159.5	0.00793656	0.205639	0.808794	1.72344	2.73815	4.46857	4.54185	3.02448	1.78993	0.755806	0.399269	0.104444	0.0241296	0.00843289	0.00287523
											160	0.00832074	0.2104	0.82391	1.75279	2.78243	4.53568	4.60591	3.05988	1.80467	0.757331	0.401335	0.104561	0.0241479	0.00841207	0.00286491
											160.5	0.00870689	0.21512	0.838844	1.78176	2.8261	4.60181	4.66901	3.09471	1.81914	0.758798	0.403365	0.104675	0.0241659	0.00839184	0.00285488
											161	0.00909424	0.219793	0.853584	1.81032	2.86914	4.66692	4.73112	3.12895	1.83332	0.760208	0.405357	0.104787	0.0241835	0.00837219	0.0028451
											161.5	0.00948204	0.224413	0.868116	1.83845	2.91149	4.73097	4.79219	3.16259	1.84722	0.761564	0.40731	0.104895	0.0242008	0.00835311	0.00283559
											162	0.00986953	0.228977	0.882429	1.86612	2.95314	4.79391	4.85217	3.19559	1.86083	0.762866	0.409223	0.105001	0.0242177	0.00833459	0.00282639
											162.5	0.010256	0.233479	0.896508	1.89332	2.99405	4.8557	4.91103	3.22794	1.87415	0.764116	0.411096	0.105104	0.0242342	0.00831664	0.00281747
											163	0.0106406	0.237914	0.910343	1.92001	3.03418	4.91628	4.96873	3.25963	1.88715	0.765314	0.412928	0.105203	0.0242504	0.00829925	0.00280881
											163.5	0.0110228	0.242277	0.92392	1.94619	3.07352	4.97562	5.02523	3.29062	1.89985	0.766463	0.414717	0.1053	0.0242662	0.0082824	0.00280041
											164	0.0114017	0.246564	0.937228	1.97182	3.11202	5.03368	5.08048	3.32091	1.91224	0.767562	0.416463	0.105394	0.0242816	0.00826609	0.00279232
											164.5	0.0117767	0.25077	0.950256	1.99689	3.14967	5.09041	5.13445	3.35047	1.9243	0.768615	0.418165	0.105486	0.0242967	0.00825034	0.00278452
											165	0.0121471	0.25489	0.962991	2.02138	3.18642	5.14577	5.18711	3.37928	1.93603	0.769621	0.419822	0.105574	0.0243113	0.00823513	0.00277696
											165.5	0.0125123	0.258921	0.975423	2.04526	3.22226	5.19973	5.23841	3.40733	1.94744	0.770582	0.421433	0.105659	0.0243255	0.00822045	0.00276965
											166	0.0128716	0.262858	0.987541	2.06853	3.25715	5.25223	5.28833	3.4346	1.95851	0.771499	0.422998	0.105741	0.0243393	0.0082063	0.00276264
											166.5	0.0132244	0.266696	0.999334	2.09115	3.29107	5.30326	5.33682	3.46108	1.96923	0.772373	0.424516	0.105821	0.0243527	0.00819269	0.00275591
											167	0.0135699	0.270432	1.01079	2.11312	3.32399	5.35276	5.38385	3.48674	1.97961	0.773206	0.425986	0.105898	0.0243657	0.0081796	0.00274943
											167.5	0.0139078	0.274061	1.0219	2.13441	3.35589	5.40071	5.42939	3.51157	1.98964	0.773998	0.427407	0.105971	0.0243782	0.00816703	0.00274319
											168	0.0142372	0.27758	1.03266	2.15501	3.38674	5.44706	5.47341	3.53555	1.99932	0.77475	0.428778	0.106042	0.0243903	0.00815497	0.00273723
											168.5	0.0145578	0.280985	1.04306	2.1749	3.41652	5.49179	5.51588	3.55868	2.00863	0.775464	0.4301	0.10611	0.024402	0.00814344	0.00273155
											169	0.0148689	0.284273	1.05308	2.19407	3.44521	5.53487	5.55677	3.58093	2.01758	0.77614	0.43137	0.106175	0.0244132	0.00813242	0.00272612
											169.5	0.01517	0.287439	1.06271	2.21249	3.47278	5.57625	5.59604	3.60229	2.02616	0.77678	0.432588	0.106238	0.024424	0.0081219	0.00272092
											170	0.0154607	0.290481	1.07196	2.23016	3.49922	5.61592	5.63368	3.62275	2.03437	0.777383	0.433755	0.106297	0.0244342	0.00811189	0.00271599
											170.5	0.0157403	0.293396	1.08081	2.24706	3.52449	5.65383	5.66965	3.6423	2.0422	0.777951	0.434869	0.106353	0.0244441	0.00810239	0.00271134
											171	0.0160085	0.29618	1.08925	2.26318	3.5486	5.68998	5.70393	3.66091	2.04965	0.778486	0.435929	0.106407	0.0244534	0.00809339	0.00270693
											171.5	0.0162648	0.29883	1.09728	2.2785	3.5715	5.72432	5.7365	3.67859	2.05672	0.778987	0.436935	0.106457	0.0244624	0.00808488	0.00270274
											172	0.0165088	0.301345	1.10489	2.29301	3.59319	5.75684	5.76734	3.69532	2.0634	0.779455	0.437887	0.106505	0.0244708	0.00807688	0.00269881
											172.5	0.01674	0.30372	1.11207	2.3067	3.61366	5.7875	5.79641	3.71109	2.06969	0.779891	0.438783	0.10655	0.0244787	0.00806937	0.00269515
											173	0.0169581	0.305954	1.11882	2.31956	3.63287	5.8163	5.82371	3.72589	2.07559	0.780296	0.439624	0.106592	0.0244861	0.00806236	0.00269174
											173.5	0.0171628	0.308044	1.12513	2.33158	3.65083	5.8432	5.8492	3.73972	2.0811	0.78067	0.440409	0.106631	0.024493	0.00805582	0.00268853
											174	0.0173537	0.309988	1.13099	2.34275	3.66751	5.86818	5.87289	3.75255	2.08621	0.781014	0.441138	0.106667	0.0244995	0.00804979	0.00268556
											174.5	0.0175304	0.311784	1.13641	2.35306	3.68291	5.89124	5.89473	3.76438	2.09092	0.781329	0.44181	0.1067	0.0245054	0.00804426	0.00268288
											175	0.0176928	0.31343	1.14136	2.3625	3.69701	5.91235	5.91474	3.77521	2.09522	0.781614	0.442424	0.10673	0.0245109	0.00803919	0.00268044
											175.5	0.0178405	0.314924	1.14586	2.37107	3.7098	5.93149	5.93287	3.78503	2.09913	0.781871	0.442981	0.106758	0.0245158	0.00803461	0.00267819
											176	0.0179733	0.316266	1.1499	2.37875	3.72127	5.94866	5.94914	3.79384	2.10262	0.7821	0.443481	0.106782	0.0245202	0.00803053	0.00267617
											176.5	0.0180909	0.317453	1.15347	2.38554	3.73141	5.96384	5.96352	3.80162	2.10571	0.782301	0.443922	0.106804	0.0245241	0.00802693	0.00267444
											177	0.0181933	0.318484	1.15657	2.39144	3.74021	5.97701	5.976	3.80837	2.10839	0.782474	0.444305	0.106823	0.0245275	0.0080238	0.00267296
											177.5	0.0182802	0.319359	1.1592	2.39643	3.74767	5.98818	5.98658	3.8141	2.11066	0.782621	0.444629	0.106838	0.0245304	0.00802116	0.00267166
											178	0.0183515	0.320075	1.16135	2.40053	3.75378	5.99733	5.99524	3.81878	2.11252	0.78274	0.444895	0.106851	0.0245327	0.00801901	0.00267056
											178.5	0.0184071	0.320633	1.16303	2.40372	3.75854	6.00445	6.00198	3.82243	2.11396	0.782833	0.445101	0.106862	0.0245345	0.00801733	0.00266975
											179	0.0184468	0.321032	1.16423	2.406	3.76194	6.00954	6.0068	3.82504	2.115	0.782899	0.445249	0.106869	0.0245358	0.00801612	0.00266924
											179.5	0.0184707	0.321272	1.16495	2.40737	3.76399	6.01259	6.0097	3.8266	2.11562	0.782938	0.445338	0.106873	0.0245366	0.00801539	0.0026689
											180	0.0184787	0.321352	1.16519	2.40782	3.76467	6.01361	6.01066	3.82713	2.11583	0.782952	0.445367	0.106875	0.0245369	0.00801521	0.00266852

## Sheet: Silane
	Elastic cross sections				Cross sections in with inelastic contribution						Elastic differential cross sections
	Energy	ECS	MTCS		Energy	ECS	ACS	TCS	MTCS		Angle	DCS_1eV	DCS_2eV	DCS_3eV	DCS_4eV	DCS_5eV	DCS_7.5eV	DCS_10eV	DCS_15eV	DCS_20eV	DCS_40eV	DCS_100eV
	1	17.8704	12.2592		1	17.8704	0	17.8704	12.2592		0	0.808553	5.92921	25.9935	43.7997	47.5974	43.6693	43.5575	48.4544	50.924	51.5204	54.8548
	2	40.1628	34.5622		2	40.1628	0	40.1628	34.5622		0.5	0.816726	5.91048	25.9243	43.737	47.5378	43.5718	43.362	48.0373	50.4196	50.4392	52.7637
	3	67.3052	53.4855		3	67.3052	0	67.3052	53.4855		1	0.839172	5.86305	25.7573	43.5809	47.3956	43.3408	42.9315	47.2302	49.3996	48.8171	50.3791
	4	79.0471	50.0364		4	79.0471	0	79.0471	50.0364		1.5	0.870542	5.80513	25.567	43.393	47.2337	43.0854	42.503	46.5294	48.4936	47.5711	48.5405
	5	74.6359	38.5529		5	74.6359	0	74.6359	38.5529		2	0.904769	5.75018	25.3908	43.21	47.0781	42.8547	42.1351	45.9153	47.7334	46.469	46.9494
	6	66.931	29.9406		6	66.931	0	66.931	29.9406		2.5	0.938031	5.7016	25.2241	43.0331	46.9222	42.6382	41.787	45.3402	47.0189	45.49	45.4193
	7.5	57.1851	22.3427		7.5	57.1851	0	57.1851	22.3427		3	0.969776	5.65699	25.0575	42.8522	46.759	42.4212	41.4516	44.8129	46.3633	44.558	43.879
	8	54.5938	20.6531		8	54.5938	0	54.5938	20.6531		3.5	1.00119	5.61421	24.8923	42.6651	46.5896	42.2048	41.1333	44.3039	45.7388	43.6538	42.2998
	10	46.6999	15.9743		10	46.6999	0	46.6999	15.9743		4	1.03304	5.57322	24.7305	42.474	46.4139	41.9899	40.8202	43.8116	45.1238	42.7475	40.6657
	12	41.3862	13.0306		12	41.3862	0	41.3862	13.0306		4.5	1.065	5.53451	24.5688	42.278	46.2291	41.7711	40.5078	43.3268	44.5207	41.8296	38.9843
	14	37.463	10.9443		14	37.4294	0.103505	37.5329	10.9235		5	1.09632	5.49776	24.4057	42.0743	46.0345	41.546	40.1973	42.8409	43.9124	40.8907	37.2719
	15	35.8171	10.1139		15	35.7187	0.259664	35.9783	10.0543		5.5	1.12684	5.46223	24.2419	41.8623	45.8301	41.3154	39.8833	42.3538	43.296	39.9275	35.5416
	16	34.3206	9.39342		16	34.1259	0.470895	34.5968	9.27951		6	1.15691	5.42759	24.0769	41.6425	45.6153	41.0779	39.5632	41.858	42.6708	38.9404	33.8093
	18	31.6767	8.21971		18	31.2192	1.00867	32.2279	7.96766		6.5	1.18682	5.39391	23.9093	41.4143	45.389	40.8315	39.2378	41.3537	42.0291	37.9295	32.0906
	20	29.4023	7.32453		20	28.6248	1.63828	30.2631	6.91457		7	1.21642	5.36111	23.7388	41.1765	45.1514	40.5761	38.9045	40.8384	41.3733	36.8995	30.3956
	25	24.9251	5.89545		25	23.2662	3.3364	26.6026	5.06481		7.5	1.24539	5.32891	23.5657	40.929	44.9024	40.3119	38.562	40.3102	40.702	35.8522	28.7333
	30	21.6709	5.14688		30	19.0221	5.10504	24.1271	3.81189		8	1.27367	5.29708	23.3893	40.6722	44.6415	40.0378	38.211	39.7702	40.0135	34.7933	27.111
	35	19.2059	4.72819		35	15.437	6.66419	22.1012	2.84068		8.5	1.30146	5.26559	23.209	40.4056	44.3687	39.7535	37.8504	39.2165	39.3111	33.7254	25.5326
	40	17.2747	4.44746		40	12.6824	7.61193	20.2943	2.11756		9	1.32892	5.23442	23.0251	40.1288	44.0842	39.4594	37.4794	38.6504	38.5937	32.654	24.0014
	45	15.7311	4.21047		45	10.9099	7.96754	18.8774	1.66903		9.5	1.35598	5.20346	22.8374	39.8419	43.788	39.1553	37.0991	38.0719	37.8628	31.5815	22.5199
	50	14.4819	3.98195		50	9.7741	7.99545	17.7696	1.39971		10	1.38245	5.17261	22.6456	39.5453	43.4799	38.8409	36.7089	37.4813	37.1208	30.5125	21.0894
	55	13.4601	3.75556		55	8.99016	7.87449	16.8647	1.22534		10.5	1.40834	5.14182	22.4496	39.2387	43.1602	38.5165	36.3087	36.88	36.3677	29.4491	19.7111
	60	12.6141	3.53521		60	8.40589	7.69009	16.096	1.10121		11	1.43377	5.11108	22.2495	38.9221	42.8292	38.1824	35.8993	36.268	35.606	28.3949	18.3864
	65	11.904	3.32628		65	7.94451	7.48081	15.4253	1.00624		11.5	1.45885	5.08038	22.0453	38.5957	42.4868	37.8386	35.4809	35.6469	34.8372	27.3514	17.1161
	70	11.2988	3.13252		70	7.56306	7.26541	14.8285	0.929028		12	1.48353	5.04967	21.8368	38.2597	42.1333	37.4853	35.0535	35.0174	34.062	26.3213	15.9013
	80	10.315	2.79548		80	6.95193	6.84697	13.7989	0.807042		12.5	1.50772	5.01893	21.6241	37.9144	41.769	37.1228	34.6179	34.3804	33.2831	25.3057	14.7433
	90	9.53774	2.52065		90	6.47086	6.46106	12.9319	0.713931		13	1.53141	4.98818	21.4075	37.5597	41.3942	36.7515	34.1745	33.7372	32.5011	24.3063	13.6426
	100	8.89891	2.29489		100	6.07497	6.11106	12.186	0.640909		13.5	1.55472	4.95742	21.1869	37.1959	41.0089	36.3715	33.7235	33.0884	31.7174	23.3243	12.5999
	120	7.8989	1.94212		120	5.44829	5.51019	10.9585	0.533163		14	1.57771	4.92664	20.9622	36.8235	40.6137	35.9832	33.2656	32.4353	30.9337	22.3606	11.6156
	150	6.83667	1.55516		150	4.76254	4.80678	9.56931	0.422499		14.5	1.60036	4.89586	20.7338	36.4424	40.2087	35.587	32.8014	31.7787	30.1508	21.416	10.6894
	200	5.68337	1.13143		200	3.97727	3.98702	7.96429	0.297126		15	1.6226	4.8651	20.5018	36.053	39.7943	35.1831	32.3311	31.1194	29.37	20.4913	9.82093
	250	4.90925	0.872862		250	3.43386	3.42538	6.85924	0.220109		15.5	1.64443	4.83437	20.2662	35.6557	39.3707	34.7719	31.8555	30.4587	28.5923	19.5873	9.00934
	300	4.34719	0.697956		300	3.03395	3.01369	6.04764	0.171525		16	1.66596	4.80371	20.0271	35.2507	38.9384	34.3538	31.3749	29.7969	27.8185	18.7043	8.25335
	400	3.57305	0.482165		400	2.47609	2.4494	4.92549	0.112818		16.5	1.68724	4.77313	19.7849	34.8383	38.4976	33.9292	30.8899	29.1351	27.0498	17.843	7.55144
	500	3.05684	0.357588		500	2.10471	2.07744	4.18215	0.0804361		17	1.70823	4.74267	19.5396	34.4187	38.0488	33.4983	30.4009	28.474	26.2867	17.0039	6.90185
	1000	1.8454	0.133283		1000	1.29217	1.22837	2.52054	0.0208592		17.5	1.72888	4.71236	19.2914	33.9925	37.5922	33.0616	29.9085	27.8143	25.5298	16.1874	6.30254
	1500	1.35452	0.0722018		1500	0.986757	0.889048	1.87581	0.0126766		18	1.74923	4.68222	19.0405	33.5598	37.1282	32.6194	29.413	27.1567	24.7803	15.3939	5.75135
	2000	1.08012	0.0460458		2000	0.810791	0.702947	1.51374	0.00917513		18.5	1.76933	4.6523	18.7872	33.1211	36.6572	32.172	28.915	26.5017	24.0382	14.624	5.24602
	3000	0.776654	0.0239526		3000	0.608052	0.500741	1.10879	0.0058926		19	1.78922	4.62264	18.5315	32.6766	36.1795	31.7198	28.4149	25.85	23.3045	13.8777	4.78417
	4000	0.609849	0.0148734		4000	0.490971	0.391471	0.882442	0.00426144		19.5	1.80889	4.59327	18.2737	32.2267	35.6955	31.2632	27.913	25.2021	22.5795	13.1556	4.36338
	5000	0.503452	0.010211		5000	0.413718	0.322465	0.736182	0.00327791		20	1.8283	4.56421	18.014	31.7718	35.2056	30.8026	27.4099	24.5584	21.8637	12.4578	3.98122
											20.5	1.84746	4.53552	17.7527	31.3123	34.7101	30.3381	26.9059	23.9196	21.1577	11.7846	3.63521
											21	1.86643	4.50724	17.4898	30.8484	34.2095	29.8703	26.4013	23.286	20.4617	11.136	3.32288
											21.5	1.88524	4.47941	17.2257	30.3805	33.704	29.3994	25.8966	22.6581	19.7762	10.5121	3.0418
											22	1.90387	4.45205	16.9606	29.9091	33.194	28.9257	25.3921	22.0362	19.1016	9.91284	2.78956
											22.5	1.92228	4.42521	16.6947	29.4344	32.6799	28.4496	24.8882	21.4206	18.4381	9.33822	2.56379
											23	1.9405	4.39893	16.4281	28.9568	32.1621	27.9713	24.385	20.8119	17.7861	8.788	2.36221
											23.5	1.95857	4.37325	16.1612	28.4766	31.641	27.4912	23.8831	20.2103	17.146	8.26198	2.18261
											24	1.9765	4.34822	15.8941	27.9943	31.1168	27.0097	23.3826	19.616	16.5179	7.75984	2.0229
											24.5	1.99429	4.32384	15.627	27.5102	30.59	26.5269	22.8839	19.0295	15.9021	7.28123	1.88106
											25	2.0119	4.30017	15.3601	27.0246	30.0609	26.0432	22.3872	18.4509	15.299	6.82571	1.75524
											25.5	2.02934	4.27724	15.0938	26.5378	29.5298	25.5588	21.8928	17.8806	14.7087	6.39283	1.64368
											26	2.04665	4.2551	14.828	26.0503	28.9972	25.0741	21.401	17.3187	14.1314	5.98206	1.54475
											26.5	2.06384	4.23376	14.5632	25.5623	28.4633	24.5894	20.9121	16.7656	13.5674	5.59284	1.45695
											27	2.0809	4.21325	14.2994	25.0742	27.9285	24.1048	20.4262	16.2214	13.0166	5.22458	1.3789
											27.5	2.09781	4.1936	14.0369	24.5863	27.3931	23.6207	19.9436	15.6864	12.4794	4.87667	1.30935
											28	2.11456	4.17487	13.7759	24.0989	26.8575	23.1374	19.4645	15.1607	11.9558	4.54847	1.24715
											28.5	2.13118	4.15705	13.5165	23.6124	26.322	22.6551	18.9892	14.6445	11.4459	4.23931	1.19125
											29	2.14769	4.14017	13.2589	23.1271	25.787	22.1739	18.5178	14.138	10.9498	3.94852	1.14074
											29.5	2.16407	4.12424	13.0033	22.6432	25.2526	21.6944	18.0506	13.6414	10.4674	3.67542	1.09479
											30	2.18029	4.10932	12.7499	22.1611	24.7193	21.2165	17.5878	13.1547	9.99897	3.41932	1.05267
											30.5	2.19637	4.09541	12.4989	21.6811	24.1874	20.7406	17.1296	12.6782	9.54435	3.17952	1.01375
											31	2.2123	4.08252	12.2504	21.2034	23.6572	20.267	16.676	12.2118	9.10352	2.95532	0.977473
											31.5	2.22811	4.07065	12.0045	20.7284	23.1289	19.7958	16.2274	11.7557	8.67647	2.74603	0.943366
											32	2.24379	4.05984	11.7615	20.2563	22.6029	19.3273	15.7839	11.31	8.26311	2.55096	0.911052
											32.5	2.2593	4.0501	11.5215	19.7874	22.0795	18.8617	15.3457	10.8748	7.86334	2.36941	0.880188
											33	2.27464	4.04143	11.2845	19.322	21.5589	18.3992	14.9128	10.45	7.47706	2.2007	0.850504
											33.5	2.28983	4.03383	11.0509	18.8603	21.0414	17.9401	14.4855	10.0357	7.10414	2.04417	0.821805
											34	2.30487	4.0273	10.8206	18.4025	20.5273	17.4845	14.0639	9.63192	6.74443	1.89916	0.7939
											34.5	2.31975	4.02188	10.5938	17.949	20.0169	17.0327	13.6481	9.23868	6.39776	1.76502	0.766662
											35	2.33445	4.01754	10.3706	17.4999	19.5104	16.5848	13.2383	8.85595	6.06395	1.64112	0.740009
											35.5	2.34896	4.01428	10.1512	17.0554	19.0081	16.1411	12.8346	8.48372	5.7428	1.52684	0.713853
											36	2.36328	4.01209	9.93555	16.6159	18.5102	15.7016	12.437	8.12192	5.43412	1.4216	0.688155
											36.5	2.37742	4.01097	9.72388	16.1814	18.017	15.2667	12.0457	7.77053	5.13767	1.32482	0.662901
											37	2.39138	4.01094	9.51623	15.7523	17.5286	14.8365	11.6608	7.42945	4.85324	1.23594	0.638066
											37.5	2.40512	4.01196	9.31271	15.3287	17.0454	14.4112	11.2824	7.09863	4.58058	1.15444	0.613667
											38	2.41864	4.01401	9.11338	14.9108	16.5676	13.9908	10.9105	6.77798	4.31944	1.07981	0.589725
											38.5	2.43194	4.01709	8.91831	14.4987	16.0953	13.5757	10.5453	6.46738	4.06957	1.01156	0.566257
											39	2.44502	4.02119	8.72757	14.0927	15.6288	13.1659	10.1867	6.16674	3.83072	0.94924	0.543303
											39.5	2.45788	4.0263	8.54124	13.6929	15.1683	12.7615	9.83495	5.87594	3.60261	0.892409	0.520901
											40	2.47049	4.03238	8.35936	13.2995	14.7139	12.3628	9.48995	5.59485	3.38498	0.840649	0.499087
											40.5	2.48283	4.0394	8.18197	12.9126	14.2659	11.9699	9.1518	5.32333	3.17755	0.793579	0.477903
											41	2.49491	4.04736	8.00913	12.5324	13.8244	11.5828	8.82053	5.06125	2.98005	0.750823	0.457387
											41.5	2.50673	4.05623	7.84088	12.159	13.3896	11.2017	8.49617	4.80847	2.79221	0.712046	0.437574
											42	2.51828	4.06599	7.67723	11.7925	12.9617	10.8267	8.17875	4.56481	2.61374	0.676915	0.418492
											42.5	2.52955	4.0766	7.51822	11.433	12.5408	10.458	7.86828	4.33013	2.44436	0.645137	0.400172
											43	2.54051	4.08801	7.36387	11.0807	12.1271	10.0956	7.56477	4.10427	2.2838	0.616423	0.382634
											43.5	2.55116	4.10023	7.21419	10.7357	11.7206	9.73959	7.26823	3.88705	2.13178	0.590515	0.365888
											44	2.56149	4.11322	7.06917	10.398	11.3216	9.39009	6.97866	3.67831	1.98802	0.567164	0.349954
											44.5	2.57152	4.12692	6.92884	10.0677	10.9301	9.04719	6.69604	3.47787	1.85224	0.546149	0.334835
											45	2.58121	4.14131	6.79319	9.7449	10.5463	8.71095	6.42037	3.28555	1.72417	0.527257	0.320526
											45.5	2.59055	4.15634	6.6622	9.42968	10.1703	8.38142	6.15162	3.10119	1.60355	0.510298	0.307037
											46	2.59954	4.17199	6.53586	9.12208	9.80212	8.0587	5.88977	2.92459	1.49008	0.495094	0.294354
											46.5	2.60816	4.18822	6.41415	8.82217	9.4419	7.74282	5.63481	2.75558	1.38353	0.481483	0.282464
											47	2.61642	4.20498	6.29706	8.52999	9.08971	7.43383	5.38669	2.59397	1.28362	0.469317	0.271365
											47.5	2.62431	4.22221	6.18453	8.24555	8.74564	7.13177	5.14537	2.43958	1.19008	0.458462	0.261032
											48	2.63181	4.2399	6.07654	7.9689	8.40972	6.83669	4.91082	2.29223	1.10269	0.448797	0.251446
											48.5	2.6389	4.258	5.97306	7.70004	8.08202	6.54862	4.683	2.15174	1.02117	0.44021	0.242591
											49	2.64558	4.27646	5.87403	7.43901	7.76259	6.26756	4.46184	2.01791	0.94529	0.432606	0.234437
											49.5	2.65185	4.29522	5.77941	7.18579	7.45147	5.99354	4.24731	1.89058	0.874815	0.425892	0.22696
											50	2.6577	4.31424	5.68912	6.94036	7.14868	5.72659	4.03934	1.76955	0.809503	0.419994	0.220131
											50.5	2.66312	4.33349	5.60314	6.70274	6.85424	5.4667	3.83788	1.65465	0.74913	0.414837	0.213922
											51	2.66809	4.35292	5.52139	6.4729	6.56818	5.21386	3.64287	1.5457	0.693479	0.410364	0.208298
											51.5	2.6726	4.37247	5.44379	6.2508	6.29049	4.96809	3.45425	1.44252	0.642329	0.406514	0.20323
											52	2.67666	4.39209	5.37028	6.0364	6.02117	4.72936	3.27194	1.34493	0.595471	0.403244	0.198687
											52.5	2.68025	4.41173	5.30079	5.82967	5.7602	4.49767	3.09588	1.25277	0.552709	0.400506	0.194631
											53	2.68338	4.43136	5.23524	5.63056	5.50759	4.27298	2.92601	1.16585	0.513838	0.398266	0.191036
											53.5	2.68601	4.45092	5.17353	5.43902	5.26328	4.05528	2.76223	1.08401	0.47867	0.396487	0.187868
											54	2.68815	4.47036	5.11558	5.25496	5.02725	3.84455	2.60448	1.00709	0.447026	0.395143	0.185093
											54.5	2.68979	4.48962	5.06131	5.07831	4.79946	3.64073	2.45269	0.934911	0.418721	0.394204	0.182686
											55	2.69093	4.50866	5.01063	4.90902	4.57987	3.44379	2.30677	0.86732	0.393585	0.393649	0.180614
											55.5	2.69156	4.52743	4.96342	4.74699	4.36841	3.25369	2.16664	0.804155	0.371458	0.393453	0.178847
											56	2.69167	4.54589	4.9196	4.59213	4.16501	3.07038	2.03222	0.745258	0.352173	0.3936	0.177362
											56.5	2.69125	4.56398	4.87906	4.44433	3.96962	2.8938	1.90343	0.690483	0.335578	0.394071	0.176128
											57	2.6903	4.58163	4.84171	4.3035	3.78215	2.7239	1.78018	0.639673	0.321531	0.394849	0.175121
											57.5	2.68881	4.59882	4.80742	4.16953	3.60252	2.56062	1.66237	0.592685	0.309884	0.395919	0.174316
											58	2.68678	4.61551	4.77608	4.04231	3.43064	2.40389	1.54994	0.549377	0.300499	0.397265	0.173691
											58.5	2.68421	4.63163	4.7476	3.92171	3.26642	2.25365	1.44278	0.509604	0.293251	0.398876	0.173219
											59	2.68108	4.64713	4.72185	3.8076	3.10976	2.10981	1.34081	0.473234	0.288009	0.400735	0.172883
											59.5	2.67739	4.66196	4.69871	3.69987	2.96054	1.97231	1.24393	0.440134	0.284651	0.402832	0.17266
											60	2.67314	4.67609	4.67807	3.59838	2.81865	1.84107	1.15205	0.41017	0.283066	0.405151	0.17253
											60.5	2.66832	4.68947	4.65981	3.50297	2.68398	1.716	1.06508	0.38322	0.283138	0.407681	0.172477
											61	2.66295	4.70206	4.64381	3.41351	2.5564	1.59701	0.982917	0.359159	0.284759	0.410408	0.172483
											61.5	2.657	4.7138	4.62994	3.32985	2.43579	1.48401	0.905475	0.337866	0.287831	0.413319	0.17253
											62	2.65047	4.72465	4.61807	3.25185	2.32201	1.37693	0.832656	0.319227	0.292253	0.4164	0.172606
											62.5	2.64337	4.73457	4.6081	3.17935	2.21492	1.27565	0.764357	0.303128	0.297929	0.419638	0.172694
											63	2.63569	4.74352	4.59989	3.11217	2.11439	1.18007	0.700484	0.289456	0.304773	0.423018	0.172782
											63.5	2.62743	4.75146	4.59331	3.05016	2.02027	1.0901	0.640943	0.27811	0.312697	0.426527	0.172858
											64	2.61859	4.75835	4.58824	2.99317	1.9324	1.00564	0.58563	0.268982	0.321614	0.430148	0.172912
											64.5	2.60917	4.76413	4.58455	2.94102	1.85064	0.926581	0.534444	0.26197	0.331451	0.433867	0.17293
											65	2.59916	4.76879	4.58212	2.89353	1.77483	0.852806	0.487291	0.256981	0.342129	0.437669	0.172905
											65.5	2.58857	4.77229	4.58082	2.85054	1.70482	0.784207	0.44407	0.253916	0.353574	0.441536	0.172829
											66	2.5774	4.7746	4.58052	2.81188	1.64042	0.720677	0.404676	0.252683	0.36572	0.445453	0.17269
											66.5	2.56565	4.77566	4.5811	2.77736	1.5815	0.662097	0.369011	0.253195	0.378499	0.449402	0.172484
											67	2.55332	4.77546	4.58244	2.74682	1.52788	0.608347	0.336977	0.255362	0.391846	0.453366	0.172202
											67.5	2.54042	4.77395	4.5844	2.72006	1.47938	0.559309	0.308469	0.2591	0.405702	0.457329	0.171839
											68	2.52693	4.77112	4.58687	2.69692	1.43583	0.514866	0.283386	0.264329	0.42001	0.461273	0.171389
											68.5	2.51287	4.76694	4.58972	2.67721	1.39708	0.474894	0.261628	0.270966	0.434711	0.465179	0.170847
											69	2.49824	4.76137	4.59284	2.66076	1.36293	0.439268	0.243095	0.278934	0.449754	0.469032	0.170209
											69.5	2.48305	4.75439	4.5961	2.64738	1.33322	0.40786	0.227682	0.28816	0.465088	0.472812	0.169471
											70	2.4673	4.74598	4.59938	2.63688	1.30777	0.380548	0.21529	0.298568	0.480665	0.476504	0.16863
											70.5	2.45098	4.73611	4.60258	2.6291	1.2864	0.357205	0.205818	0.310087	0.496436	0.480089	0.167682
											71	2.43411	4.72478	4.60557	2.62385	1.26894	0.3377	0.199166	0.322649	0.51236	0.483552	0.166627
											71.5	2.41669	4.71195	4.60824	2.62096	1.25521	0.321901	0.19523	0.336186	0.528392	0.486875	0.165463
											72	2.39872	4.69761	4.61049	2.62025	1.24501	0.309681	0.193911	0.350631	0.54449	0.490043	0.164188
											72.5	2.38022	4.68174	4.6122	2.62153	1.2382	0.300911	0.195111	0.365921	0.560618	0.49304	0.162802
											73	2.36119	4.66433	4.61328	2.62463	1.23457	0.295457	0.198728	0.381993	0.576737	0.495852	0.161305
											73.5	2.34164	4.64537	4.61362	2.6294	1.23397	0.293185	0.204661	0.398787	0.59281	0.498464	0.159697
											74	2.32156	4.62485	4.61312	2.63564	1.2362	0.293965	0.212813	0.416245	0.608805	0.500863	0.157979
											74.5	2.30098	4.60277	4.61168	2.6432	1.2411	0.297667	0.223085	0.434307	0.624687	0.503035	0.156151
											75	2.27989	4.5791	4.60921	2.6519	1.24849	0.304157	0.235378	0.452918	0.640425	0.504969	0.154216
											75.5	2.25831	4.55385	4.60562	2.66159	1.25819	0.313302	0.249593	0.472024	0.655988	0.506652	0.152176
											76	2.23625	4.52702	4.60083	2.6721	1.27005	0.32497	0.265636	0.49157	0.671348	0.508075	0.150032
											76.5	2.21372	4.49861	4.59475	2.68328	1.28388	0.33903	0.283408	0.511506	0.686476	0.509226	0.147788
											77	2.19072	4.46862	4.58729	2.69496	1.29952	0.355353	0.302814	0.53178	0.701346	0.510098	0.145446
											77.5	2.16726	4.43705	4.57839	2.707	1.31681	0.373807	0.323757	0.552343	0.715932	0.510682	0.143009
											78	2.14335	4.4039	4.56798	2.71926	1.33558	0.394261	0.346145	0.573147	0.730209	0.51097	0.140482
											78.5	2.11902	4.36918	4.55598	2.73158	1.35567	0.416587	0.369883	0.594145	0.744154	0.510956	0.137868
											79	2.09426	4.33291	4.54232	2.74384	1.37693	0.440659	0.394877	0.615291	0.757745	0.510635	0.13517
											79.5	2.06909	4.2951	4.52696	2.75588	1.3992	0.466349	0.421036	0.636541	0.770959	0.510002	0.132394
											80	2.04352	4.25575	4.50983	2.76758	1.42232	0.493531	0.448269	0.657851	0.783776	0.509051	0.129545
											80.5	2.01756	4.21487	4.49088	2.77881	1.44615	0.52208	0.476485	0.679179	0.796178	0.507783	0.126626
											81	1.99122	4.1725	4.47006	2.78946	1.47055	0.551876	0.505594	0.700483	0.808144	0.506194	0.123643
											81.5	1.96453	4.12863	4.44733	2.79939	1.49536	0.582795	0.535508	0.721723	0.819657	0.504282	0.1206
											82	1.93749	4.08331	4.42265	2.80851	1.52047	0.61472	0.566141	0.74286	0.830702	0.502049	0.117504
											82.5	1.91011	4.03655	4.39599	2.81669	1.54571	0.64753	0.597406	0.763856	0.841262	0.499494	0.114359
											83	1.88241	3.98837	4.36731	2.82384	1.57098	0.681111	0.629217	0.784673	0.851321	0.49662	0.11117
											83.5	1.8544	3.9388	4.33659	2.82986	1.59613	0.71535	0.661492	0.805276	0.860867	0.493428	0.107944
											84	1.8261	3.88786	4.30381	2.83465	1.62106	0.750133	0.694147	0.825628	0.869887	0.489922	0.104685
											84.5	1.79751	3.8356	4.26895	2.83812	1.64564	0.785352	0.727102	0.845697	0.878367	0.486106	0.1014
											85	1.76867	3.78203	4.232	2.8402	1.66975	0.820897	0.760277	0.865448	0.886297	0.481985	0.0980936
											85.5	1.73958	3.7272	4.19295	2.84081	1.69328	0.856666	0.793594	0.884849	0.893666	0.477565	0.0947718
											86	1.71025	3.67114	4.15181	2.83988	1.71614	0.892554	0.826975	0.90387	0.900467	0.472851	0.0914404
											86.5	1.68071	3.61388	4.10856	2.83733	1.73822	0.928462	0.860345	0.922479	0.906689	0.467851	0.0881042
											87	1.65097	3.55546	4.06323	2.83312	1.75942	0.964292	0.893631	0.940647	0.912324	0.462573	0.0847697
											87.5	1.62103	3.49593	4.01582	2.82717	1.77966	0.999949	0.926761	0.958346	0.917368	0.457025	0.0814422
											88	1.59093	3.43533	3.96635	2.81945	1.79884	1.03534	0.959664	0.975549	0.921813	0.451215	0.0781267
											88.5	1.56068	3.37371	3.91483	2.80991	1.81689	1.07038	0.992272	0.992229	0.925655	0.445153	0.0748291
											89	1.53029	3.3111	3.86129	2.79852	1.83373	1.10497	1.02452	1.00836	0.928888	0.438848	0.0715548
											89.5	1.49978	3.24755	3.80577	2.78524	1.84929	1.13905	1.05634	1.02392	0.931513	0.432312	0.0683082
											90	1.46917	3.18311	3.7483	2.77004	1.86351	1.17252	1.08766	1.03888	0.933524	0.425555	0.0650953
											90.5	1.43847	3.11784	3.68892	2.75291	1.87631	1.2053	1.11844	1.05322	0.93492	0.418586	0.061921
											91	1.4077	3.05178	3.62766	2.73383	1.88766	1.23733	1.14861	1.06693	0.935701	0.41142	0.0587892
											91.5	1.37688	2.98499	3.56458	2.7128	1.89749	1.26854	1.17811	1.07997	0.935869	0.404065	0.0557057
											92	1.34603	2.91753	3.49973	2.6898	1.90576	1.29885	1.20688	1.09233	0.935422	0.396535	0.0526749
											92.5	1.31517	2.84944	3.43317	2.66485	1.91243	1.3282	1.23488	1.104	0.934362	0.388842	0.0497007
											93	1.2843	2.78078	3.36496	2.63794	1.91746	1.35653	1.26206	1.11495	0.932693	0.380997	0.0467878
											93.5	1.25345	2.71161	3.29515	2.6091	1.92084	1.38378	1.28836	1.12517	0.93042	0.373015	0.043941
											94	1.22264	2.642	3.22382	2.57835	1.92252	1.4099	1.31374	1.13464	0.927544	0.364906	0.0411629
											94.5	1.19188	2.57201	3.15105	2.5457	1.9225	1.43484	1.33815	1.14336	0.924071	0.356683	0.0384587
											95	1.16119	2.50168	3.07691	2.51119	1.92075	1.45855	1.36156	1.1513	0.920009	0.34836	0.0358319
											95.5	1.1306	2.43109	3.00147	2.47485	1.91728	1.48098	1.38393	1.15846	0.915362	0.339949	0.0332855
											96	1.10011	2.3603	2.92483	2.43673	1.91207	1.5021	1.40521	1.16483	0.910139	0.331462	0.0308234
											96.5	1.06975	2.28937	2.84707	2.39687	1.90512	1.52187	1.42537	1.17039	0.904346	0.322914	0.0284495
											97	1.03953	2.21837	2.76827	2.35532	1.89645	1.54025	1.44439	1.17515	0.897994	0.314314	0.0261659
											97.5	1.00946	2.14737	2.68854	2.31214	1.88607	1.55723	1.46222	1.17908	0.891092	0.305678	0.0239762
											98	0.979579	2.07642	2.60798	2.26739	1.87398	1.57276	1.47885	1.18219	0.883649	0.297017	0.0218838
											98.5	0.94989	2.00561	2.52667	2.22113	1.86022	1.58683	1.49425	1.18448	0.875677	0.288344	0.0198903
											99	0.920415	1.93499	2.44473	2.17344	1.8448	1.59941	1.5084	1.18593	0.867187	0.279671	0.0179992
											99.5	0.89117	1.86463	2.36226	2.12439	1.82776	1.6105	1.52128	1.18656	0.858192	0.27101	0.016213
											100	0.862172	1.7946	2.27937	2.07406	1.80914	1.62008	1.53286	1.18635	0.848704	0.262372	0.0145334
											100.5	0.833438	1.72498	2.19617	2.02253	1.78896	1.62814	1.54314	1.1853	0.838736	0.253769	0.012963
											101	0.804985	1.65582	2.11277	1.9699	1.76729	1.63468	1.55211	1.18343	0.828303	0.245215	0.0115042
											101.5	0.776829	1.58721	2.0293	1.91624	1.74415	1.63969	1.55975	1.18073	0.81742	0.236718	0.0101582
											102	0.748987	1.5192	1.94585	1.86167	1.71962	1.64318	1.56605	1.1772	0.8061	0.22829	0.00892705
											102.5	0.721477	1.45187	1.86257	1.80627	1.69374	1.64515	1.57102	1.17286	0.79436	0.219943	0.0078131
											103	0.694314	1.3853	1.77957	1.75015	1.66657	1.64561	1.57465	1.1677	0.782216	0.211686	0.00681688
											103.5	0.667515	1.31954	1.69696	1.69342	1.63819	1.64457	1.57693	1.16174	0.769685	0.20353	0.00594041
											104	0.641095	1.25466	1.61489	1.63618	1.60865	1.64205	1.57788	1.15498	0.756784	0.195484	0.00518529
											104.5	0.615069	1.19075	1.53346	1.57855	1.57803	1.63806	1.5775	1.14743	0.743529	0.187559	0.00455203
											105	0.589453	1.12786	1.45282	1.52064	1.5464	1.63263	1.57579	1.13911	0.729939	0.179764	0.00404217
											105.5	0.564261	1.06607	1.37308	1.46257	1.51385	1.62578	1.57277	1.13003	0.716032	0.172107	0.00365691
											106	0.539508	1.00544	1.29438	1.40446	1.48045	1.61753	1.56844	1.1202	0.701828	0.164598	0.00339668
											106.5	0.515211	0.94604	1.21684	1.34644	1.4463	1.60793	1.56283	1.10963	0.687343	0.157244	0.00326245
											107	0.491382	0.887939	1.1406	1.28862	1.41147	1.59699	1.55594	1.09834	0.672597	0.150054	0.00325524
											107.5	0.468037	0.831205	1.06578	1.23114	1.37606	1.58475	1.5478	1.08635	0.657611	0.143035	0.0033752
											108	0.445187	0.775903	0.992523	1.17411	1.34016	1.57127	1.53843	1.07367	0.642404	0.136196	0.00362294
											108.5	0.422848	0.722097	0.920949	1.11768	1.30387	1.55656	1.52786	1.06032	0.626996	0.129542	0.0039992
											109	0.40103	0.669851	0.851193	1.06198	1.26729	1.54069	1.51609	1.04633	0.611405	0.123082	0.00450385
											109.5	0.379747	0.61923	0.783384	1.00713	1.23051	1.52369	1.50318	1.0317	0.595652	0.11682	0.00513724
											110	0.359012	0.570296	0.71765	0.953267	1.19363	1.50562	1.48913	1.01647	0.57976	0.110765	0.00589973
											110.5	0.338837	0.523111	0.65412	0.900528	1.15677	1.48651	1.47399	1.00066	0.563746	0.10492	0.00679102
											111	0.319233	0.477736	0.592922	0.849046	1.12002	1.46644	1.45779	0.984276	0.547632	0.0992927	0.0078112
											111.5	0.300211	0.434229	0.534183	0.798957	1.0835	1.44545	1.44056	0.967356	0.531438	0.0938872	0.0089602
											112	0.281783	0.39265	0.478029	0.750394	1.0473	1.42359	1.42234	0.949921	0.515183	0.0887089	0.0102376
											112.5	0.263958	0.353054	0.424584	0.703494	1.01155	1.40093	1.40317	0.931997	0.49889	0.0837624	0.0116433
											113	0.246747	0.315497	0.37397	0.658391	0.976336	1.37753	1.38309	0.91361	0.482579	0.0790519	0.0131767
											113.5	0.230158	0.280032	0.326308	0.615218	0.941785	1.35345	1.36214	0.894784	0.466268	0.0745818	0.0148375
											114	0.214202	0.246713	0.281717	0.57411	0.908003	1.32875	1.34035	0.875548	0.449978	0.0703558	0.016625
											114.5	0.198887	0.215592	0.240315	0.5352	0.875102	1.3035	1.31779	0.855928	0.433729	0.0663774	0.0185386
											115	0.184222	0.186716	0.202216	0.498619	0.843192	1.27776	1.29448	0.835955	0.417542	0.06265	0.0205776
											115.5	0.170214	0.160135	0.167534	0.464497	0.812385	1.25161	1.27049	0.815655	0.401435	0.0591767	0.0227413
											116	0.15687	0.135894	0.136377	0.432963	0.782791	1.2251	1.24585	0.795058	0.385429	0.0559602	0.0250286
											116.5	0.144199	0.114037	0.108854	0.404145	0.754522	1.19831	1.22062	0.774193	0.369541	0.0530032	0.0274387
											117	0.132205	0.0946071	0.0850694	0.378168	0.727687	1.17132	1.19484	0.75309	0.35379	0.050308	0.0299707
											117.5	0.120896	0.0776448	0.0651251	0.355156	0.702396	1.14418	1.16857	0.731781	0.338197	0.0478767	0.0326232
											118	0.110276	0.063189	0.0491199	0.33523	0.678758	1.11697	1.14185	0.710294	0.322779	0.0457112	0.0353953
											118.5	0.100351	0.0512766	0.0371496	0.318509	0.656879	1.08976	1.11475	0.68866	0.307554	0.0438131	0.0382859
											119	0.0911254	0.0419425	0.0293062	0.305109	0.636864	1.06264	1.08731	0.666911	0.292538	0.042184	0.0412932
											119.5	0.0826033	0.0352194	0.0256787	0.295142	0.618819	1.03565	1.05958	0.645078	0.277749	0.040825	0.0444162
											120	0.0747883	0.031138	0.0263524	0.288721	0.602847	1.00889	1.03163	0.623191	0.263205	0.0397372	0.0476536
											120.5	0.0676836	0.0297268	0.031409	0.285952	0.589049	0.982417	1.0035	0.601283	0.248921	0.0389216	0.0510034
											121	0.0612919	0.0310122	0.0409261	0.286941	0.577524	0.95631	0.975252	0.579382	0.234914	0.0383786	0.0544644
											121.5	0.0556151	0.0350186	0.0549775	0.291787	0.568369	0.930639	0.946937	0.557522	0.221199	0.038109	0.0580353
											122	0.0506549	0.0417679	0.073633	0.300587	0.561679	0.905475	0.918611	0.535733	0.20779	0.0381128	0.0617136
											122.5	0.0464123	0.0512798	0.0969581	0.313436	0.557545	0.88089	0.89033	0.514046	0.194703	0.0383904	0.065498
											123	0.0428881	0.0635718	0.125014	0.330422	0.556057	0.856952	0.862147	0.492492	0.181951	0.0389414	0.0693871
											123.5	0.0400822	0.0786589	0.157859	0.351631	0.557304	0.833731	0.834117	0.471101	0.169549	0.039766	0.0733782
											124	0.0379943	0.0965539	0.195544	0.377143	0.561368	0.811296	0.806294	0.449903	0.157508	0.0408635	0.0774698
											124.5	0.0366236	0.117267	0.238119	0.407038	0.568331	0.789715	0.778732	0.428929	0.145841	0.0422336	0.0816605
											125	0.0359686	0.140806	0.285626	0.441386	0.578272	0.769054	0.751486	0.408207	0.134561	0.0438753	0.0859471
											125.5	0.0360273	0.167178	0.338103	0.480257	0.591264	0.749378	0.724607	0.387768	0.123678	0.045788	0.0903283
											126	0.0367972	0.196385	0.395586	0.523712	0.607378	0.730752	0.698149	0.367638	0.113204	0.0479706	0.0948024
											126.5	0.0382756	0.228427	0.458102	0.571811	0.626682	0.713236	0.672161	0.347848	0.103149	0.050422	0.099366
											127	0.0404588	0.263304	0.525677	0.624607	0.649241	0.696891	0.646695	0.328423	0.093521	0.0531407	0.104018
											127.5	0.043343	0.30101	0.59833	0.682148	0.675115	0.681777	0.6218	0.309392	0.0843304	0.0561254	0.108756
											128	0.0469236	0.34154	0.676075	0.744477	0.70436	0.667951	0.597527	0.290782	0.0755855	0.0593746	0.113577
											128.5	0.0511959	0.384883	0.758922	0.811633	0.737029	0.655469	0.573922	0.272616	0.067294	0.0628863	0.118479
											129	0.0561544	0.431028	0.846874	0.88365	0.77317	0.644384	0.551033	0.254921	0.0594631	0.0666588	0.12346
											129.5	0.061793	0.479962	0.939931	0.960554	0.812827	0.634748	0.528904	0.237721	0.0520993	0.0706898	0.128517
											130	0.0681055	0.531667	1.03809	1.04237	0.85604	0.62661	0.50758	0.22104	0.0452084	0.0749778	0.133649
											130.5	0.0750847	0.586125	1.14133	1.12911	0.902843	0.620016	0.487103	0.2049	0.0387958	0.0795198	0.138852
											131	0.0827235	0.643315	1.24964	1.22078	0.95327	0.615011	0.467515	0.189323	0.0328662	0.0843137	0.144124
											131.5	0.0910138	0.703212	1.363	1.3174	1.00735	0.611639	0.448856	0.174331	0.0274238	0.0893565	0.149462
											132	0.0999473	0.765789	1.48138	1.41896	1.06509	0.609938	0.431165	0.159942	0.022472	0.0946462	0.154865
											132.5	0.109515	0.831019	1.60476	1.52546	1.12653	0.609947	0.414477	0.146177	0.0180136	0.100179	0.160328
											133	0.119709	0.898868	1.73308	1.63688	1.19167	0.6117	0.398829	0.133054	0.0140506	0.105953	0.165851
											133.5	0.130518	0.969305	1.86632	1.75321	1.26052	0.61523	0.384252	0.12059	0.0105847	0.111964	0.17143
											134	0.141932	1.04229	2.00442	1.87443	1.33308	0.620567	0.370779	0.108801	0.00761686	0.11821	0.177062
											134.5	0.153942	1.11779	2.14732	2.0005	1.40935	0.627735	0.358439	0.0977025	0.00514738	0.124686	0.182744
											135	0.166535	1.19576	2.29498	2.13139	1.48933	0.636761	0.347261	0.0873083	0.00317603	0.13139	0.188476
											135.5	0.179702	1.27616	2.44733	2.26706	1.573	0.647663	0.337269	0.0776314	0.00170186	0.138317	0.194253
											136	0.193428	1.35894	2.60429	2.40746	1.66035	0.660461	0.328488	0.0686839	0.000723372	0.145463	0.200071
											136.5	0.207704	1.44406	2.7658	2.55255	1.75136	0.675171	0.32094	0.0604766	0.000238448	0.152825	0.205931
											137	0.222515	1.53147	2.93179	2.70226	1.846	0.691804	0.314645	0.0530191	0.000244421	0.160399	0.211828
											137.5	0.237849	1.62111	3.10215	2.85653	1.94424	0.71037	0.309618	0.0463199	0.000738032	0.16818	0.217758
											138	0.253692	1.71292	3.27681	3.01529	2.04605	0.730875	0.305878	0.0403862	0.00171543	0.176164	0.223721
											138.5	0.270031	1.80687	3.45568	3.17847	2.15139	0.753322	0.303435	0.0352241	0.00317219	0.184346	0.229713
											139	0.286852	1.90287	3.63865	3.34599	2.2602	0.777712	0.302303	0.0308387	0.00510332	0.192721	0.235729
											139.5	0.304139	2.00089	3.82562	3.51777	2.37245	0.804042	0.302491	0.0272338	0.00750331	0.201285	0.241771
											140	0.32188	2.10084	4.0165	3.6937	2.48808	0.832304	0.304004	0.0244119	0.0103661	0.210032	0.247832
											140.5	0.340058	2.20268	4.21115	3.8737	2.60703	0.862492	0.306847	0.0223744	0.0136852	0.218959	0.253911
											141	0.358657	2.30633	4.40948	4.05767	2.72923	0.894592	0.311024	0.0211215	0.0174534	0.228057	0.260005
											141.5	0.377663	2.41172	4.61136	4.24549	2.85461	0.92859	0.316534	0.0206521	0.0216632	0.237323	0.266111
											142	0.39706	2.51879	4.81667	4.43705	2.98312	0.964468	0.323374	0.0209639	0.0263065	0.246751	0.272225
											142.5	0.41683	2.62746	5.02527	4.63225	3.11465	1.0022	0.331542	0.0220537	0.0313746	0.256336	0.278347
											143	0.436958	2.73767	5.23704	4.83095	3.24915	1.04178	0.341029	0.0239167	0.0368584	0.26607	0.284472
											143.5	0.457426	2.84933	5.45184	5.03304	3.38651	1.08316	0.351828	0.0265472	0.0427486	0.275949	0.290597
											144	0.478218	2.96238	5.66952	5.23837	3.52665	1.12631	0.363928	0.0299382	0.0490351	0.285966	0.296722
											144.5	0.499316	3.07673	5.88995	5.44682	3.66948	1.17121	0.377315	0.0340816	0.0557078	0.296114	0.302841
											145	0.520703	3.1923	6.11298	5.65825	3.8149	1.21782	0.391975	0.0389681	0.0627559	0.306387	0.308951
											145.5	0.542361	3.30902	6.33846	5.87251	3.9628	1.26611	0.40789	0.0445874	0.0701682	0.316778	0.315052
											146	0.564272	3.42681	6.56623	6.08945	4.11308	1.31602	0.42504	0.050928	0.077933	0.327281	0.32114
											146.5	0.586418	3.54557	6.79614	6.30892	4.26563	1.36751	0.443405	0.0579772	0.0860386	0.337889	0.327211
											147	0.608781	3.66523	7.02803	6.53077	4.42033	1.42055	0.462959	0.0657214	0.0944726	0.348595	0.333264
											147.5	0.631343	3.78571	7.26174	6.75483	4.57708	1.47507	0.483679	0.0741459	0.103222	0.35939	0.339296
											148	0.654086	3.90691	7.49709	6.98095	4.73575	1.53104	0.505536	0.0832349	0.112275	0.370269	0.345302
											148.5	0.67699	4.02875	7.73393	7.20895	4.89621	1.58839	0.528501	0.0929715	0.121618	0.381223	0.351282
											149	0.700037	4.15114	7.97208	7.43868	5.05834	1.64706	0.552543	0.103338	0.131237	0.392246	0.357233
											149.5	0.723208	4.274	8.21137	7.66994	5.22202	1.70701	0.577628	0.114316	0.141118	0.403329	0.36315
											150	0.746484	4.39724	8.45163	7.90258	5.38711	1.76816	0.603722	0.125886	0.151249	0.414465	0.369033
											150.5	0.769847	4.52076	8.69268	8.1364	5.55347	1.83046	0.630789	0.138027	0.161614	0.425645	0.374879
											151	0.793277	4.64448	8.93434	8.37124	5.72097	1.89384	0.658789	0.150718	0.172199	0.436863	0.380682
											151.5	0.816755	4.7683	9.17643	8.60691	5.88947	1.95824	0.687683	0.163937	0.182989	0.448108	0.386444
											152	0.840263	4.89213	9.41878	8.84322	6.05883	2.02357	0.71743	0.177661	0.19397	0.459375	0.392161
											152.5	0.863781	5.01589	9.66119	9.07999	6.2289	2.08978	0.747986	0.191865	0.205126	0.470653	0.397828
											153	0.887289	5.13948	9.9035	9.31703	6.39955	2.1568	0.779309	0.206527	0.216443	0.481936	0.403445
											153.5	0.91077	5.26281	10.1455	9.55415	6.57061	2.22454	0.811352	0.22162	0.227905	0.493214	0.409009
											154	0.934204	5.38579	10.387	9.79116	6.74195	2.29293	0.844068	0.237119	0.239497	0.504479	0.414516
											154.5	0.957573	5.50832	10.6279	10.0279	6.91341	2.3619	0.87741	0.252997	0.251204	0.515722	0.419966
											155	0.980856	5.63032	10.8679	10.2641	7.08485	2.43137	0.911329	0.269228	0.26301	0.526935	0.425355
											155.5	1.00404	5.75169	11.1069	10.4996	7.25611	2.50126	0.945774	0.285785	0.2749	0.53811	0.43068
											156	1.02709	5.87234	11.3446	10.7342	7.42703	2.57148	0.980695	0.302639	0.286858	0.549236	0.43594
											156.5	1.05001	5.99219	11.581	10.9678	7.59748	2.64197	1.01604	0.319762	0.298868	0.560307	0.441132
											157	1.07277	6.11113	11.8157	11.2001	7.76728	2.71263	1.05176	0.337126	0.310915	0.571313	0.446253
											157.5	1.09535	6.22908	12.0487	11.4309	7.93629	2.78339	1.08779	0.354701	0.322983	0.582246	0.451302
											158	1.11774	6.34596	12.2797	11.66	8.10435	2.85415	1.12409	0.372459	0.335057	0.593096	0.456276
											158.5	1.13991	6.46166	12.5086	11.8873	8.27132	2.92485	1.1606	0.39037	0.347121	0.603855	0.461172
											159	1.16185	6.57611	12.7352	12.1126	8.43703	2.99539	1.19726	0.408403	0.35916	0.614514	0.46599
											159.5	1.18354	6.68922	12.9592	12.3356	8.60133	3.06569	1.23402	0.42653	0.371159	0.625065	0.470726
											160	1.20497	6.8009	13.1806	12.5562	8.76407	3.13567	1.27083	0.444719	0.383102	0.635499	0.475377
											160.5	1.22611	6.91106	13.3991	12.7741	8.9251	3.20524	1.30763	0.462942	0.394974	0.645807	0.479943
											161	1.24695	7.01962	13.6146	12.9893	9.08426	3.27432	1.34436	0.481169	0.40676	0.655981	0.484422
											161.5	1.26748	7.1265	13.8269	13.2015	9.24141	3.34283	1.38097	0.499368	0.418446	0.666012	0.488809
											162	1.28767	7.23161	14.0358	13.4104	9.39641	3.41068	1.4174	0.51751	0.430016	0.675892	0.493106
											162.5	1.30751	7.33487	14.2411	13.6161	9.54909	3.47779	1.4536	0.535566	0.441457	0.685613	0.497308
											163	1.32699	7.43621	14.4428	13.8182	9.69932	3.54409	1.48951	0.553506	0.452755	0.695166	0.501414
											163.5	1.34609	7.53554	14.6405	14.0166	9.84695	3.60947	1.52508	0.5713	0.463894	0.704543	0.505423
											164	1.36479	7.6328	14.8342	14.2111	9.99185	3.67388	1.56025	0.58892	0.474861	0.713736	0.509333
											164.5	1.38307	7.72789	15.0238	14.4015	10.1339	3.73723	1.59497	0.606335	0.485644	0.722737	0.51314
											165	1.40094	7.82075	15.2089	14.5877	10.2729	3.79943	1.62919	0.623519	0.496227	0.731539	0.516845
											165.5	1.41836	7.91131	15.3896	14.7695	10.4087	3.86042	1.66285	0.640443	0.506599	0.740133	0.520446
											166	1.43532	7.9995	15.5656	14.9468	10.5413	3.92012	1.69591	0.657079	0.516747	0.748512	0.52394
											166.5	1.45182	8.08524	15.7369	15.1194	10.6705	3.97846	1.72831	0.6734	0.526657	0.756669	0.527326
											167	1.46784	8.16848	15.9032	15.2871	10.7961	4.03535	1.76	0.68938	0.536319	0.764597	0.530603
											167.5	1.48337	8.24914	16.0644	15.4498	10.9181	4.09073	1.79094	0.704992	0.54572	0.772288	0.533768
											168	1.49839	8.32716	16.2204	15.6073	11.0363	4.14454	1.82108	0.720212	0.554848	0.779737	0.536822
											168.5	1.51289	8.40249	16.3711	15.7595	11.1507	4.1967	1.85036	0.735014	0.563693	0.786935	0.539762
											169	1.52686	8.47505	16.5163	15.9063	11.261	4.24715	1.87875	0.749374	0.572244	0.793877	0.542586
											169.5	1.54029	8.54481	16.6559	16.0476	11.3672	4.29583	1.90621	0.763269	0.580491	0.800556	0.545295
											170	1.55317	8.61169	16.7899	16.1831	11.4692	4.34267	1.93268	0.776677	0.588423	0.806967	0.547886
											170.5	1.56549	8.67566	16.918	16.3129	11.5669	4.38762	1.95814	0.789576	0.596031	0.813103	0.550357
											171	1.57724	8.73665	17.0403	16.4367	11.6601	4.43062	1.98254	0.801945	0.603306	0.81896	0.552709
											171.5	1.58841	8.79463	17.1565	16.5545	11.7489	4.47161	2.00583	0.813764	0.610238	0.824531	0.554941
											172	1.59898	8.84954	17.2666	16.6661	11.8331	4.51054	2.028	0.825013	0.616821	0.829812	0.557049
											172.5	1.60896	8.90134	17.3705	16.7715	11.9126	4.54737	2.049	0.835675	0.623044	0.834797	0.559035
											173	1.61833	8.95	17.4681	16.8705	11.9873	4.58205	2.0688	0.845731	0.628903	0.839483	0.560898
											173.5	1.62709	8.99546	17.5593	16.9631	12.0573	4.61453	2.08737	0.855167	0.634388	0.843865	0.562635
											174	1.63523	9.03771	17.6441	17.0492	12.1223	4.64477	2.10468	0.863967	0.639493	0.847939	0.564247
											174.5	1.64274	9.0767	17.7224	17.1287	12.1824	4.67274	2.12071	0.872116	0.644213	0.851701	0.565733
											175	1.64962	9.1124	17.794	17.2015	12.2374	4.6984	2.13543	0.879601	0.648542	0.855147	0.567091
											175.5	1.65586	9.14479	17.8591	17.2676	12.2874	4.72171	2.14881	0.88641	0.652474	0.858275	0.568323
											176	1.66146	9.17384	17.9174	17.3268	12.3322	4.74265	2.16085	0.892532	0.656005	0.861082	0.569426
											176.5	1.6664	9.19952	17.969	17.3793	12.3719	4.76119	2.17151	0.897958	0.659131	0.863565	0.570401
											177	1.6707	9.22182	18.0138	17.4248	12.4064	4.7773	2.18078	0.902678	0.661848	0.865721	0.571246
											177.5	1.67434	9.24072	18.0518	17.4634	12.4356	4.79097	2.18865	0.906685	0.664152	0.867549	0.571962
											178	1.67733	9.25621	18.0829	17.4951	12.4595	4.80218	2.19511	0.909972	0.666041	0.869047	0.572549
											178.5	1.67965	9.26826	18.1071	17.5197	12.4782	4.81091	2.20014	0.912534	0.667512	0.870213	0.573005
											179	1.68131	9.27688	18.1244	17.5373	12.4915	4.81716	2.20374	0.914367	0.668565	0.871047	0.573331
											179.5	1.68231	9.28205	18.1348	17.5479	12.4995	4.82091	2.2059	0.915468	0.669197	0.871548	0.573527
											180	1.68264	9.28378	18.1383	17.5514	12.5022	4.82216	2.20662	0.915836	0.669407	0.871715	0.573592
